# Supplementary material for: Discrimination of Adzuki Bean (Vigna angularis) Geographical Origin by Targeted and Non-Targeted Metabolite Profiling with Gas Chromatography Time-of-Flight Mass Spectrometry
Source: MDPI journal article supplement (doi:10.3390/metabo10030112), 2020-03-17
Supplement: s1 [file s1]

# Discrimination of geographical origin of adzuki bean (*Vigna angularis*) based on targeted and non-targeted metabolite profiling by using gas chromatography-time-of-flight mass spectrometry

Tae Jin Kim <sup>1,†</sup>, Jeong Gon Park <sup>1,†</sup>, Soon Kil Ahn <sup>1</sup>, Kil Won Kim <sup>1</sup>, Jaehyuk Choi <sup>1</sup>, Hyun Young Kim <sup>2</sup>, Woo Duck Seo <sup>2,\*</sup>, and Jae Kwang Kim <sup>1,\*</sup>

<sup>1</sup> Division of Life Sciences, College of Life Sciences and Bioengineering, Incheon National Univ., Incheon, 22012, Republic of Korea; [f91gd@inu.ac.kr](mailto:f91gd@inu.ac.kr) (T.J.K.); [ToLuck@inu.ac.kr](mailto:ToLuck@inu.ac.kr) (J.G.P); [skahn@inu.ac.kr](mailto:skahn@inu.ac.kr) (S.K.A); [kilwon@inu.ac.kr](mailto:kilwon@inu.ac.kr) (K.W.K); [jaehyukc@inu.ac.kr](mailto:jaehyukc@inu.ac.kr) (J.C); [kjkpi@inu.ac.kr](mailto:kjkpi@inu.ac.kr) (K.J.K.)

<sup>2</sup> Division of Crop Foundation, National Institute of Crop Science, Rural Development Administration, Wanju, Jeonbuk, 55365, Republic of Korea; [hykim@korea.kr](mailto:hykim@korea.kr) (H.Y.K); [swd2002@korea.kr](mailto:swd2002@korea.kr) (W.D.S)

\* Correspondence: [swd2002@korea.kr](mailto:swd2002@korea.kr) (W.D.S); Tel.: +82-63-238-5305; [kjkpi@inu.ac.kr](mailto:kjkpi@inu.ac.kr) (K.J.K.); Tel.: +82-32-835-8241

† These authors contributed equally to this work.

---

## Supplementary figures

**Figure S1.** PCA score plots of targeted and non-targeted metabolite profiling with UV-scaling and pareto-scaling normalization. A (Target and UV-scaling), B (Non-target and UV-scaling), C (Target and pareto-scaling), D (Non-target and pareto-scaling).

**Figure S2.** PCA loading plots of targeted and non-targeted metabolite profiling with UV-scaling and pareto-scaling normalization. A (Target and UV-scaling), B (Non-target and UV-scaling), C (Target and pareto-scaling), D (Non-target and pareto-scaling).

**Figure S3.** OPLS-DA loading plots of targeted and non-targeted metabolite profiling with UV-scaling and pareto-scaling normalization. A (Target and UV-scaling), B (Non-target and UV-scaling), C (Target and pareto-scaling), D (Non-target and pareto-scaling).

**Figure S4.** OPLS-DA VIP (variables importance in the projection) plot of targeted and non-targeted metabolite profiling with UV-scaling and pareto-scaling normalization. A (Target and UV-scaling), B (Non-target and UV-scaling), C (Target and pareto-scaling), D (Non-target and pareto-scaling).

**Figure S5.** Permutation test of OPLS-DA of non-targeted metabolite profiling with pareto-scaling normalization. The number of permutations for the permutation test is 200.

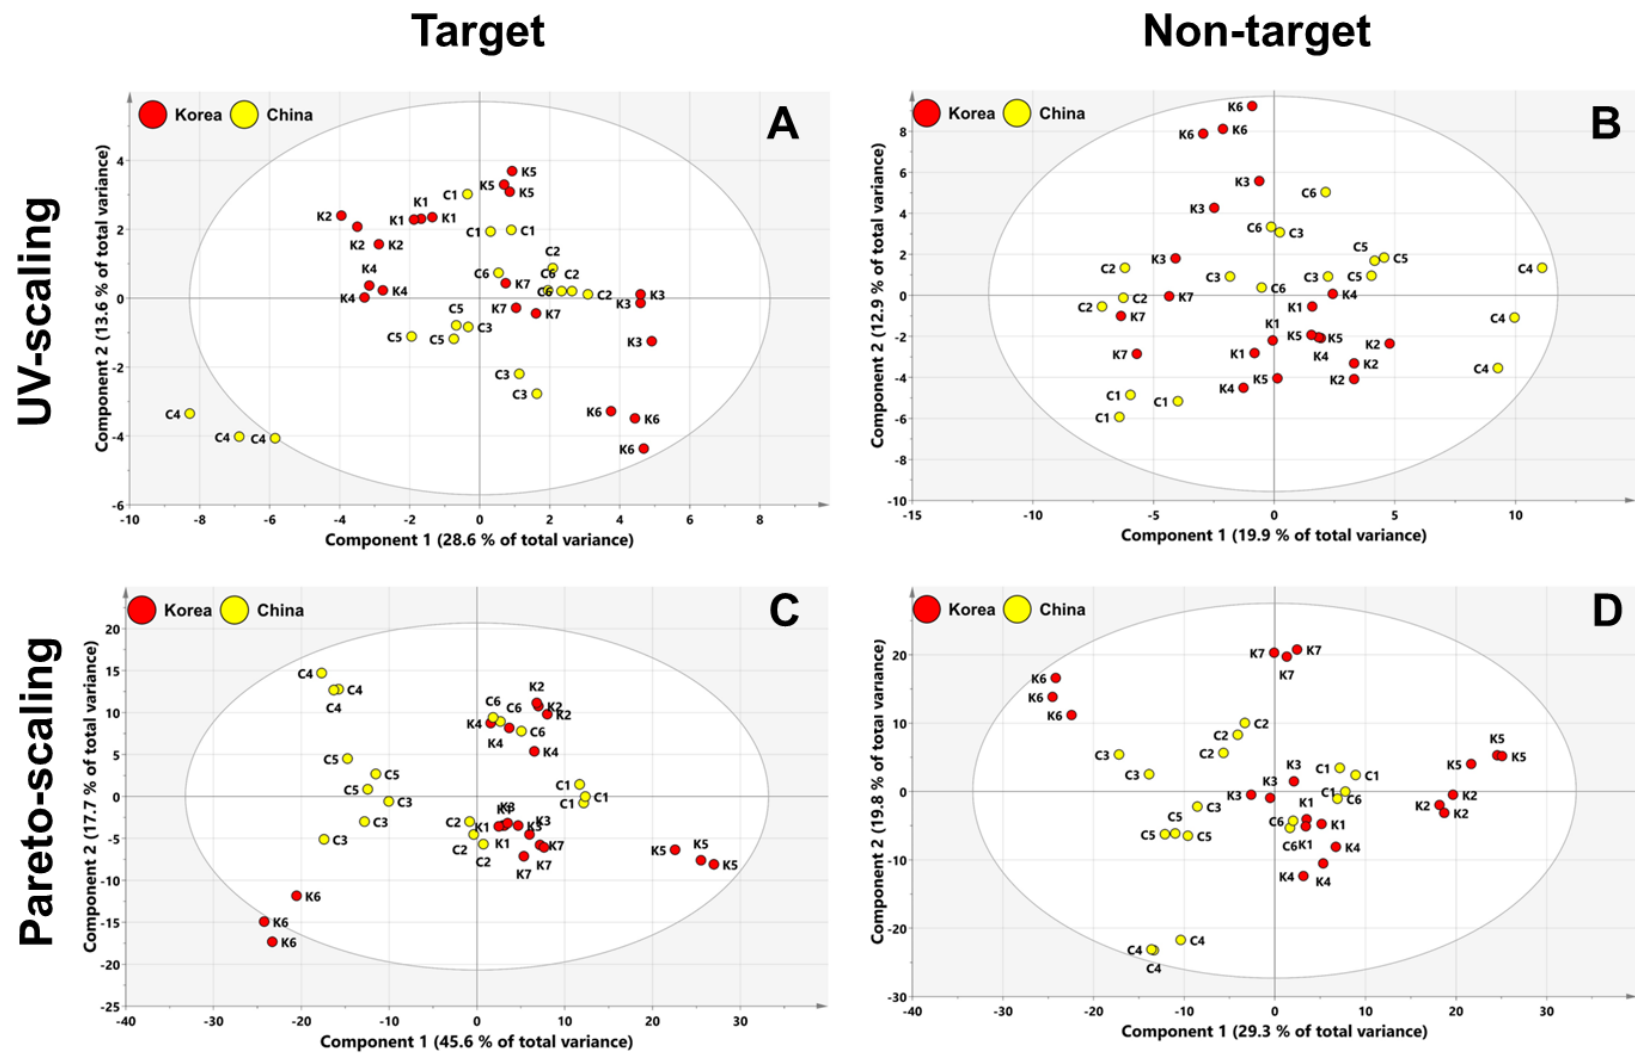

**Figure S1.** PCA score plots of targeted and non-targeted metabolite profiling with UV-scaling and pareto-scaling normalization. A (Target and UV-scaling), B (Non-target and UV-scaling), C (Target and pareto-scaling), D (Non-target and pareto-scaling). K1, Korea 1; K2, Korea 2; K3, Korea 3; K4, Korea 4; K5, Korea 5; K6, Korea 6; K7, Korea 7; C1, China 1; C2, China 2; C3, China 3; C4, China 4; C5, China 5; C6, China 6.

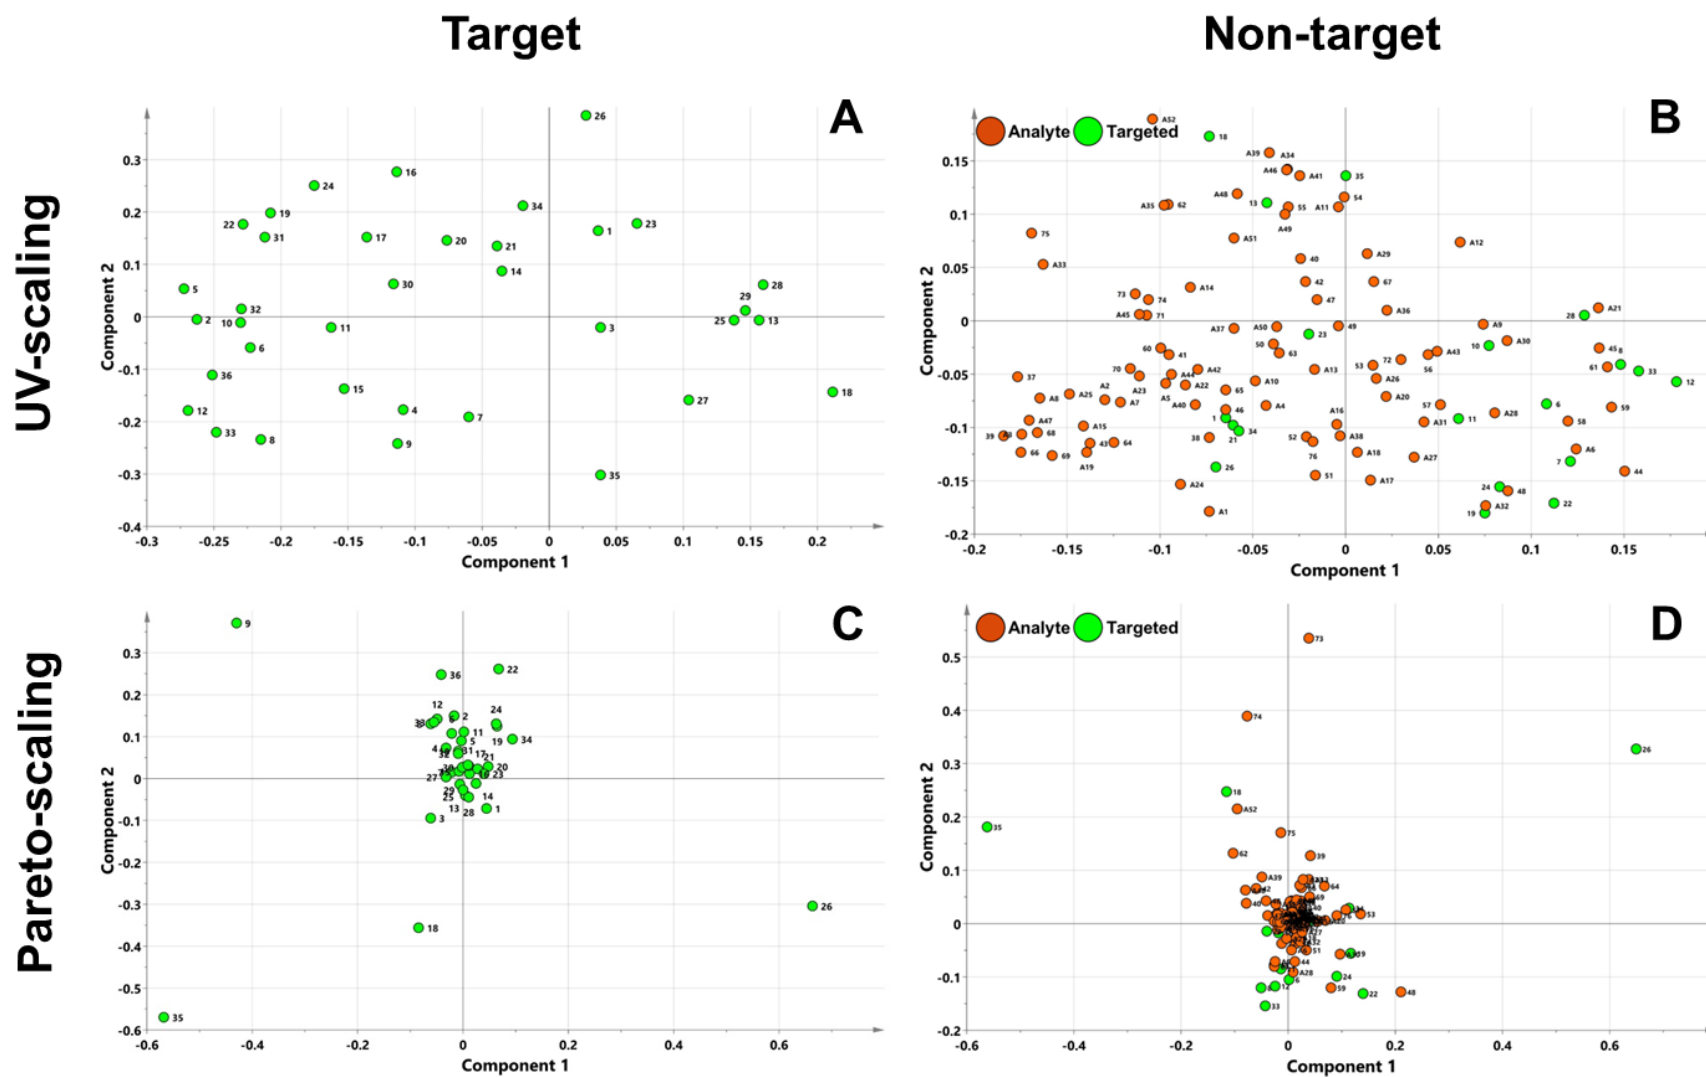

**Figure S2.** PCA loading plots of targeted and non-targeted metabolite profiling with UV-scaling and pareto-scaling normalization. A (Target and UV-scaling), B (Non-target and UV-scaling), C (Target and pareto-scaling), D (Non-target and pareto-scaling).

(Continued figure S2). 1. Lactic acid; 2. Alanine; 3. Oxalic acid; 4. Glycolic acid; 5. Valine; 6. Urea; 7. Serine; 8. Ethanolamine; 9. Phosphoric acid; 10. Isolucine; 11. Proline; 12. Glycine; 13. Succinic acid; 14. Glyceric acid; 15. Fumaric acid; 16. Threonine; 17.  $\beta$ -Alanine; 18. Malic acid; 19. Aspartic acid; 20. Pyroglutamic acid; 21. Threonic acid; 22. Glutamic acid; 23. Phenylalanine; 24. Asparagine; 25. Shikimic acid; 26. Citric acid; 27. Fructose; 28. Galactose; 29. Glucose; 30. Mannitol; 31. Lysine; 32. Tyrosine; 33. Inositol; 34. Tryptophan; 35. Sucrose; 36. Raffinose; 37. Butanedioic acid; 38. Ethylene glycol; 39. 1,3-Propanediol; 40. Propane; 41. Hydroxylamine; 42. N,O,O-tri(trimethylsilyl)-1-c(13)-N-carboxy-glycine; 43. 1,4-Butanediol; 44. Norvaline; 45. Glycerol; 46. 5-Methoxy-3-chromanol; 47. Propanoic acid; 48. Pipelic acid; 49. L-Aspartic acid; 50. D-(-)-Erythrose; 51. 2-Methoxy-3-methoxycarbonyl-1,3-pentadiene; 52. Suberyl glycine; 53. L-(+)-Tartaric acid; 54. D-Ribose; 55. D-Galactose; 56. Allantoin; 57. L-Histidine; 58. 3-(2-fluorophenyl)spiro(oxirane-2,2'-norbornane); 59. D-Pinitol; 60. D-(+)-Talopyranose; 61. Ribonic acid, 2,3,4,5-tetrakis-O-(trimethylsilyl)-, trimethylsilyl ester; 62. Galacturonic acid; 63. Pentadecanoic acid; 64. Tris(trimethylsilyl)amine; 65. Ethyl D-glucopyranoside; 66. Cyclohexanecarboxylic acid; 67. Bis(2-ethylhexyl) phthalate; 68. (2,3-Diphenylcyclopropyl)methyl phenyl sulfoxide1; 69. (2,3-Diphenylcyclopropyl)methyl phenyl sulfoxide2; 70. Tetracyclo[4.3.0.0(2,7)]nonane-7,7,8,8-tetracarbonitrile; 71. Methyl galactoside (1S,2R,3S,4R,5R)-; 72. D-Galactoside; 73. D-Glucopyranose; 74. D-Galactose 1; 75. D-Galactose2; 76. Dimethyl hexopyranosiduronate; A1 ~ 52. Analyte.

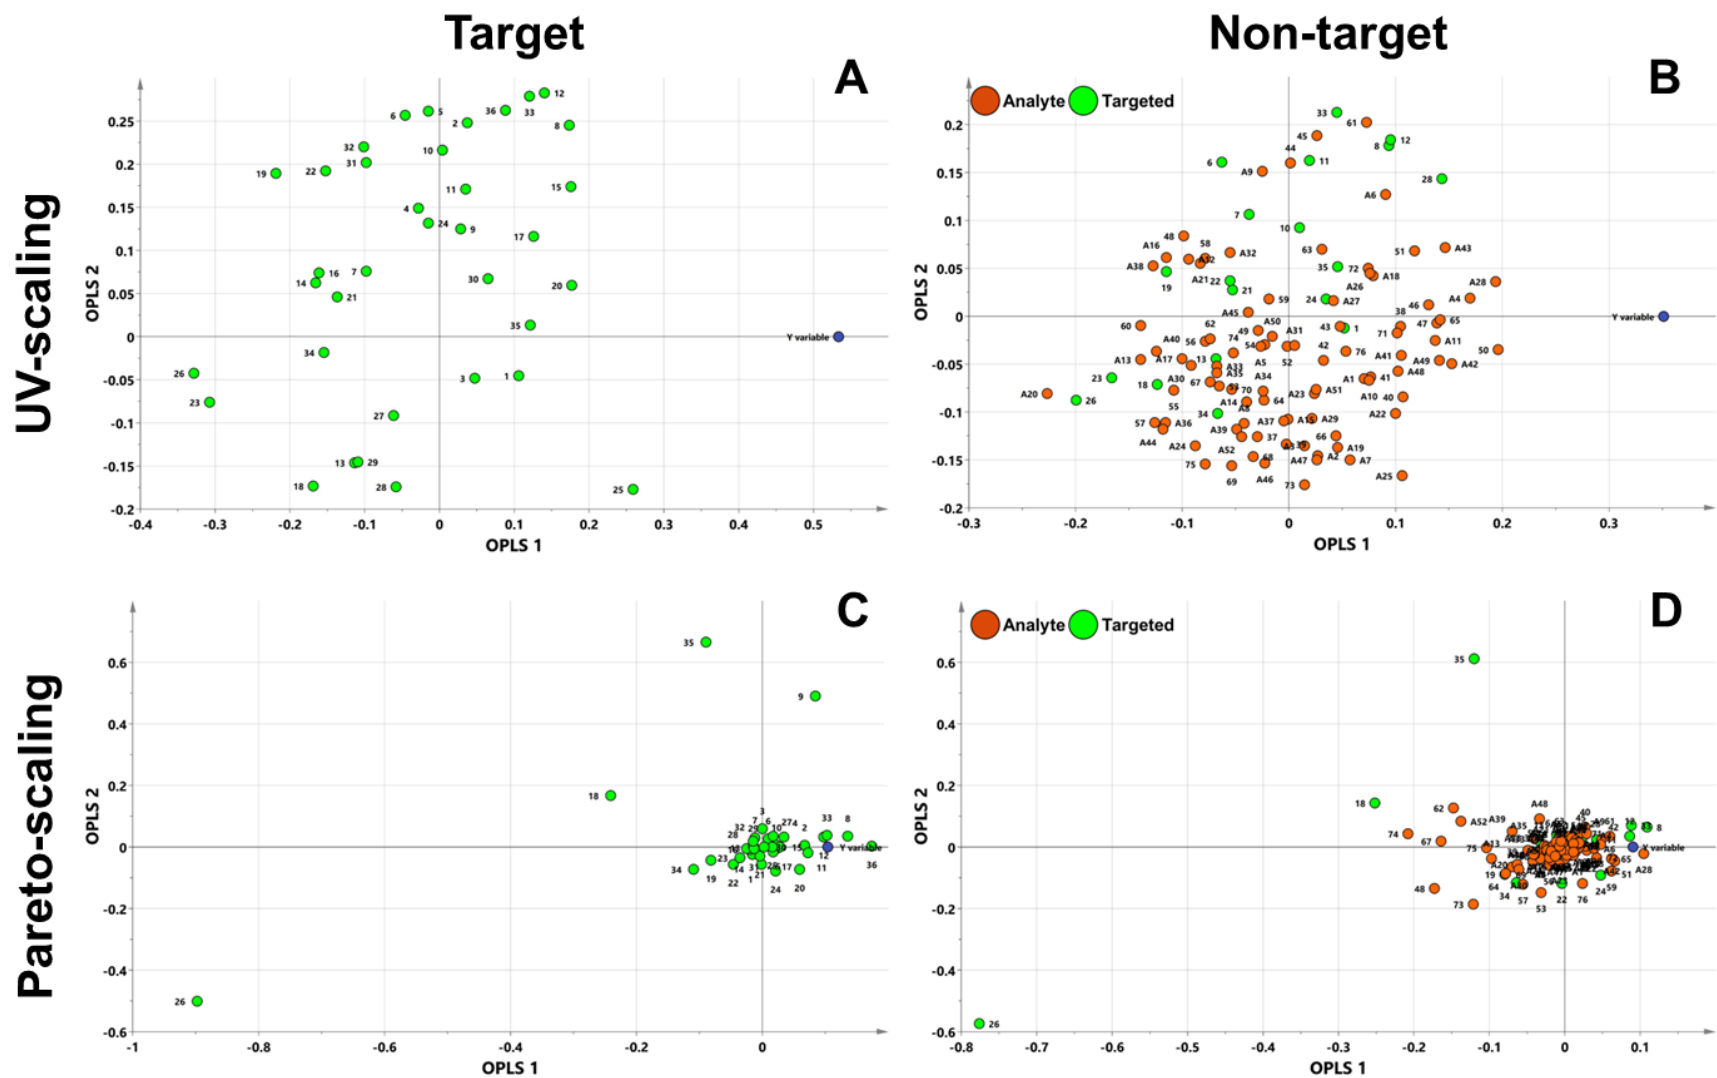

**Figure S3.** OPLS-DA loading plots of targeted and non-targeted metabolite profiling with UV-scaling and pareto-scaling normalization. A (Target and UV-scaling), B (Non-target and UV-scaling), C (Target and pareto-scaling), D (Non-target and pareto-scaling).

(Continued figure S3). 1. Lactic acid; 2. Alanine; 3. Oxalic acid; 4. Glycolic acid; 5. Valine; 6. Urea; 7. Serine; 8. Ethanolamine; 9. Phosphoric acid; 10. Isolucine; 11. Proline; 12. Glycine; 13. Succinic acid; 14. Glyceric acid; 15. Fumaric acid; 16. Threonine; 17.  $\beta$ -Alanine; 18. Malic acid; 19. Aspartic acid; 20. Pyroglutamic acid; 21. Threonic acid; 22. Glutamic acid; 23. Phenylalanine; 24. Asparagine; 25. Shikimic acid; 26. Citric acid; 27. Fructose; 28. Galactose; 29. Glucose; 30. Mannitol; 31. Lysine; 32. Tyrosine; 33. Inositol; 34. Tryptophan; 35. Sucrose; 36. Raffinose; 37. Butanedioic acid; 38. Ethylene glycol; 39. 1,3-Propanediol; 40. Propane; 41. Hydroxylamine; 42. N,O,O-tri(trimethylsilyl)-1-c(13)-N-carboxy-glycine; 43. 1,4-Butanediol; 44. Norvaline; 45. Glycerol; 46. 5-Methoxy-3-chromanol; 47. Propanoic acid; 48. Pipelic acid; 49. L-Aspartic acid; 50. D-(-)-Erythrose; 51. 2-Methoxy-3-methoxycarbonyl-1,3-pentadiene; 52. Suberylglycine; 53. L-(+)-Tartaric acid; 54. D-Ribose; 55. D-Galactose; 56. Allantoin; 57. L-Histidine; 58. 3-(2-fluorophenyl)spiro(oxirane-2,2'-norbornane); 59. D-Pinitol; 60. D-(+)-Talopyranose; 61. Ribonic acid, 2,3,4,5-tetrakis-O-(trimethylsilyl)-, trimethylsilyl ester; 62. Galacturonic acid; 63. Pentadecanoic acid; 64. Tris(trimethylsilyl)amine; 65. Ethyl D-glucopyranoside; 66. Cyclohexanecarboxylic acid; 67. Bis(2-ethylhexyl) phthalate; 68. (2,3-Diphenylcyclopropyl)methyl phenyl sulfoxide1; 69. (2,3-Diphenylcyclopropyl)methyl phenyl sulfoxide2; 70. Tetracyclo[4.3.0.0(2,7)]nonane-7,7,8,8-tetracarbonitrile; 71. Methyl galactoside (1S,2R,3S,4R,5R)-; 72. D-Galactoside; 73. D-Glucopyranose; 74. D-Galactose 1; 75. D-Galactose2; 76. Dimethyl hexopyranosiduronate; A1 ~ 52. Analyte.

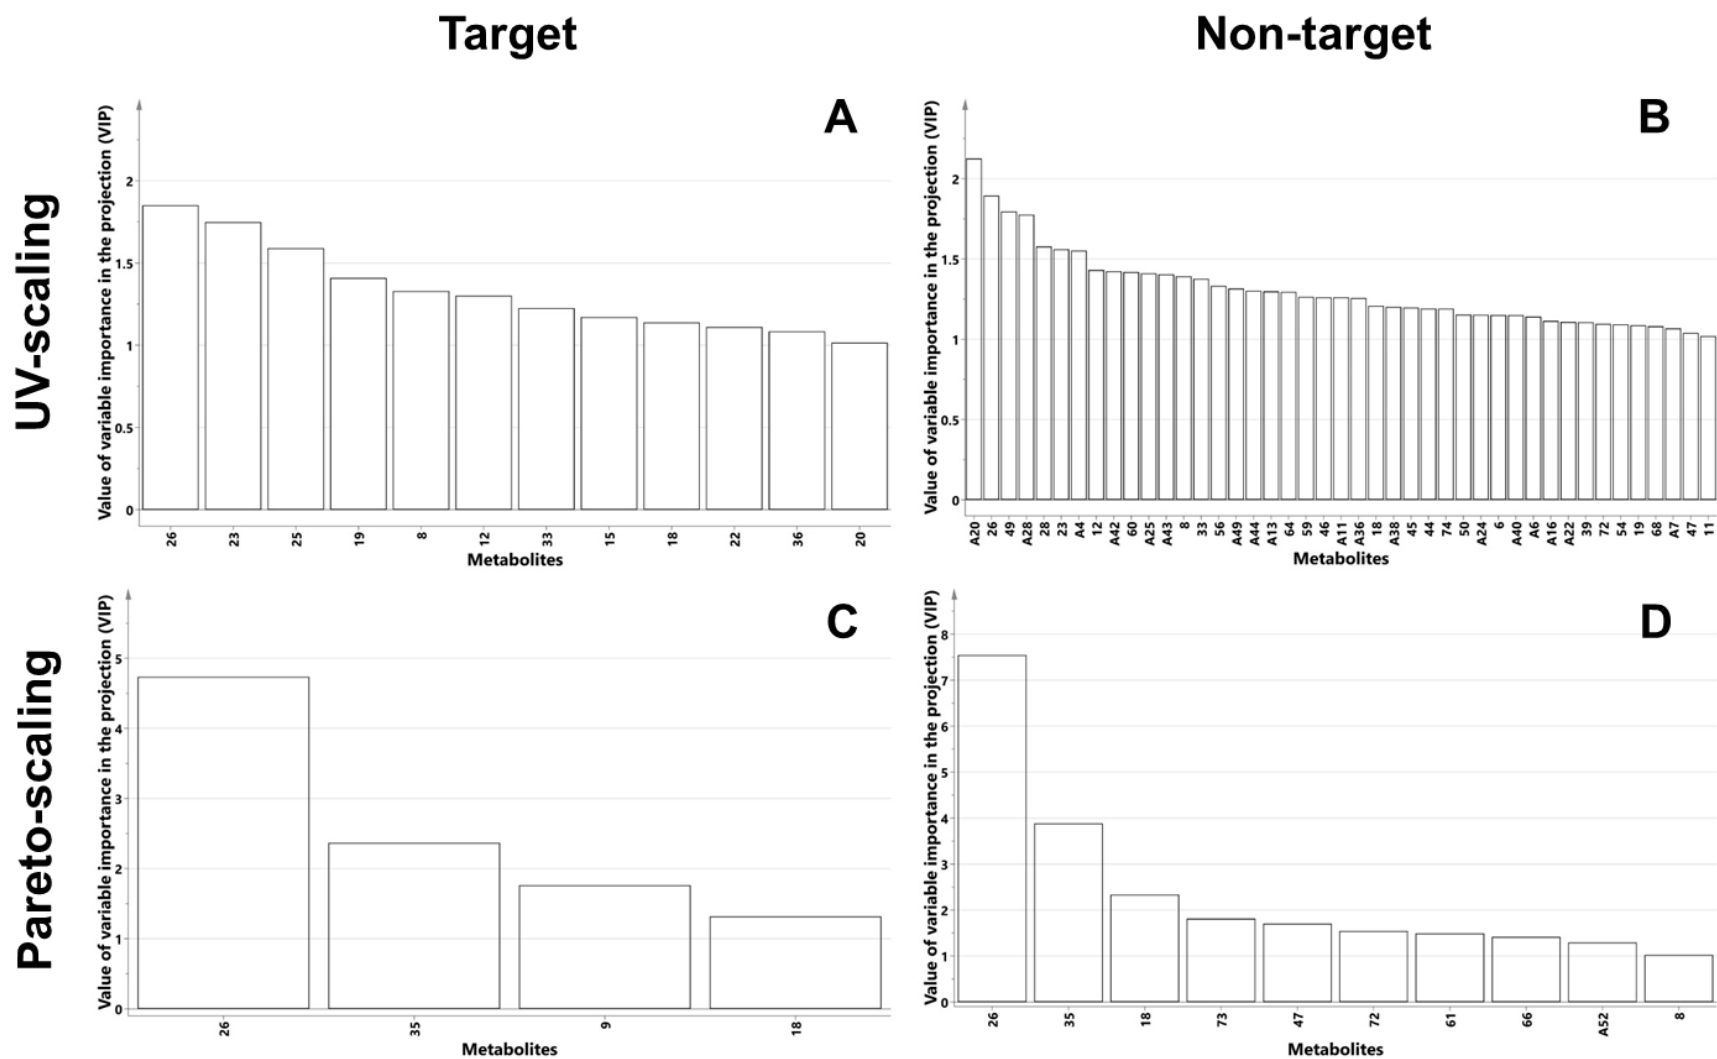

**Figure S4.** OPLS-DA VIP (variables importance in the projection) plot of targeted and non-targeted metabolite profiling with UV-scaling and pareto-scaling normalization. A (Target and UV-scaling), B (Non-target and UV-scaling), C (Target and pareto-scaling), D (Non-target and pareto-scaling).

(Continued figure S4). 1. Lactic acid; 2. Alanine; 3. Oxalic acid; 4. Glycolic acid; 5. Valine; 6. Urea; 7. Serine; 8. Ethanolamine; 9. Phosphoric acid; 10. Isolucine; 11. Proline; 12. Glycine; 13. Succinic acid; 14. Glyceric acid; 15. Fumaric acid; 16. Threonine; 17.  $\beta$ -Alanine; 18. Malic acid; 19. Aspartic acid; 20. Pyroglutamic acid; 21. Threonic acid; 22. Glutamic acid; 23. Phenylalanine; 24. Asparagine; 25. Shikimic acid; 26. Citric acid; 27. Fructose; 28. Galactose; 29. Glucose; 30. Mannitol; 31. Lysine; 32. Tyrosine; 33. Inositol; 34. Tryptophan; 35. Sucrose; 36. Raffinose; 37. Butanedioic acid; 38. Ethylene glycol; 39. 1,3-Propanediol; 40. Propane; 41. Hydroxylamine; 42. N,O,O-tri(trimethylsilyl)-1-c(13)-N-carboxy-glycine; 43. 1,4-Butanediol; 44. Norvaline; 45. Glycerol; 46. 5-Methoxy-3-chromanol; 47. Propanoic acid; 48. Pipelic acid; 49. L-Aspartic acid; 50. D-(-)-Erythrose; 51. 2-Methoxy-3-methoxycarbonyl-1,3-pentadiene; 52. Suberyl glycine; 53. L-(+)-Tartaric acid; 54. D-Ribose; 55. D-Galactose; 56. Allantoin; 57. L-Histidine; 58. 3-(2-fluorophenyl)spiro(oxirane-2,2'-norbornane); 59. D-Pinitol; 60. D-(+)-Talopyranose; 61. Ribonic acid, 2,3,4,5-tetrakis-O-(trimethylsilyl)-, trimethylsilyl ester; 62. Galacturonic acid; 63. Pentadecanoic acid; 64. Tris(trimethylsilyl)amine; 65. Ethyl D-glucopyranoside; 66. Cyclohexanecarboxylic acid; 67. Bis(2-ethylhexyl) phthalate; 68. (2,3-Diphenylcyclopropyl)methyl phenyl sulfoxide1; 69. (2,3-Diphenylcyclopropyl)methyl phenyl sulfoxide2; 70. Tetracyclo[4.3.0.0(2,7)]nonane-7,7,8,8-tetracarbonitrile; 71. Methyl galactoside (1S,2R,3S,4R,5R)-; 72. D-Galactoside; 73. D-Glucopyranose; 74. D-Galactose 1; 75. D-Galactose2; 76. Dimethyl hexopyranosiduronate; A1 ~ 52. Analyte.



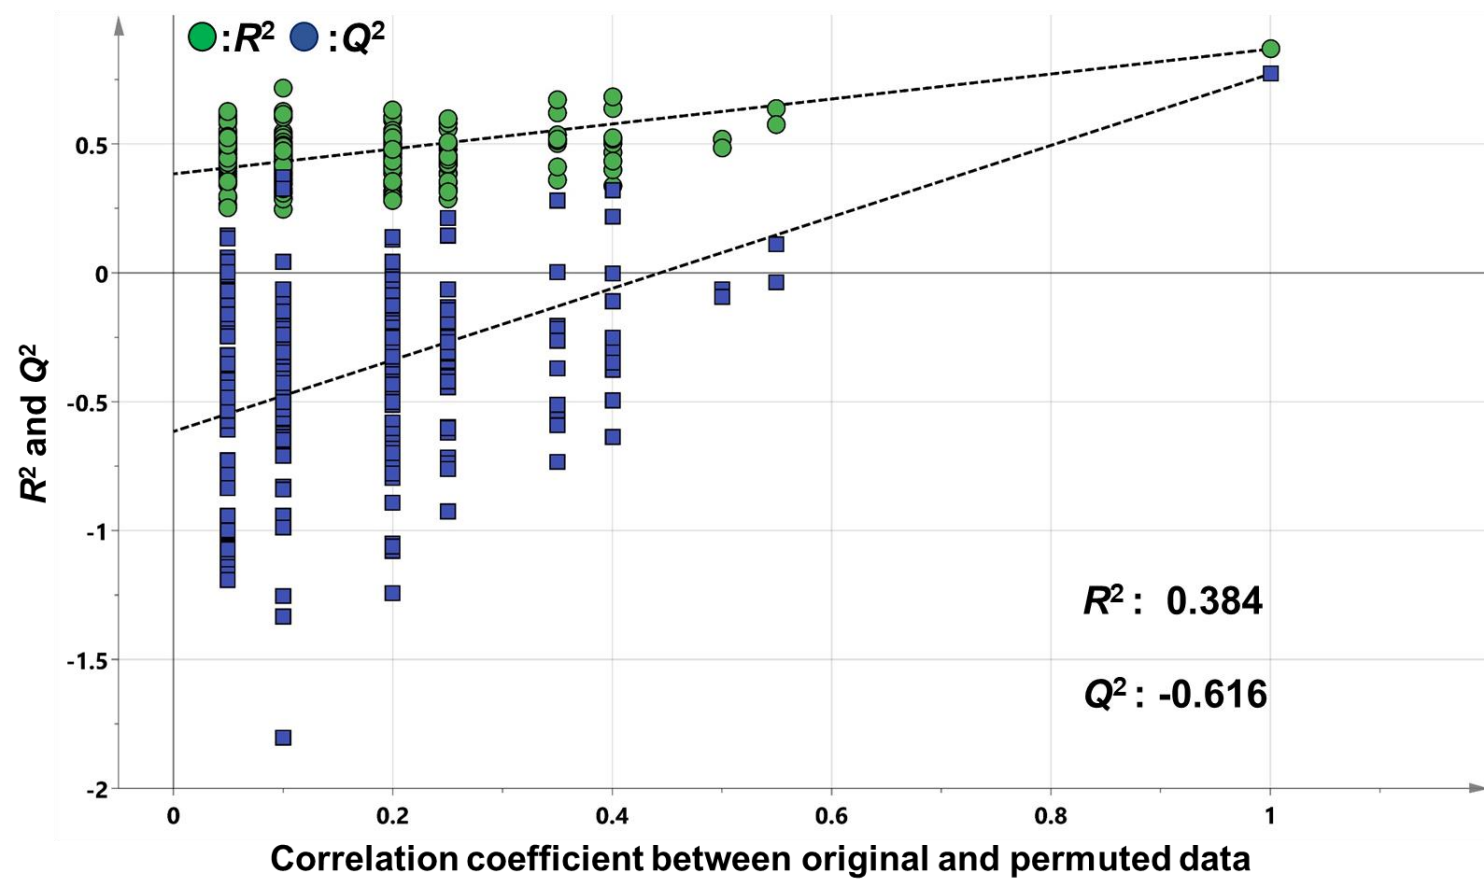

**Figure S5.** Permutation test of OPLS-DA of non-targeted metabolite profiling with pareto-scaling normalization. The number of permutations for the permutation test is 200.

# Discrimination of geographical origin of adzuki bean (*Vigna angularis*) based on targeted and non-targeted metabolite profiling by using gas chromatography-time-of-flight mass spectrometry

Tae Jin Kim <sup>1,†</sup>, Jeong Gon Park <sup>1,†</sup>, Soon Kil Ahn <sup>1</sup>, Kil Won Kim <sup>1</sup>, Jaehyuk Choi <sup>1</sup>, Hyun Young Kim <sup>2</sup>, Woo Duck Seo <sup>2,\*</sup>, and Jae Kwang Kim <sup>1,\*</sup>

<sup>1</sup> Division of Life Sciences, College of Life Sciences and Bioengineering, Incheon National Univ., Incheon, 22012, Republic of Korea; [f91gd@inu.ac.kr](mailto:f91gd@inu.ac.kr) (T.J.K.); [ToLuck@inu.ac.kr](mailto:ToLuck@inu.ac.kr) (J.G.P); [skahn@inu.ac.kr](mailto:skahn@inu.ac.kr) (S.K.A); [kilwon@inu.ac.kr](mailto:kilwon@inu.ac.kr) (K.W.K); [jaehyukc@inu.ac.kr](mailto:jaehyukc@inu.ac.kr) (J.C); [kjkpi@inu.ac.kr](mailto:kjkpi@inu.ac.kr) (K.J.K.)

<sup>2</sup> Division of Crop Foundation, National Institute of Crop Science, Rural Development Administration, Wanju, Jeonbuk, 55365, Republic of Korea; [hykim@korea.kr](mailto:hykim@korea.kr) (H.Y.K); [swd2002@korea.kr](mailto:swd2002@korea.kr) (W.D.S)

\* Correspondence: [swd2002@korea.kr](mailto:swd2002@korea.kr) (W.D.S); Tel.: +82-63-238-5305; [kjkpi@inu.ac.kr](mailto:kjkpi@inu.ac.kr) (K.J.K.); Tel.: +82-32-835-8241

† These authors contributed equally to this work.

---

## Supplementary tables

**Table S1.** Composition and content (ratio/g) of hydrophilic compounds by using targeted metabolite profiling of adzuki bean (*Vigna angularis*) cultivated in Korea.

**Table S2.** Composition and content (ratio/g) of hydrophilic compounds by using targeted metabolite profiling of adzuki bean (*Vigna angularis*) cultivated in China.

**Table S3.** Composition and content (ratio/g) of hydrophilic compounds by using non-targeted metabolite profiling, which matched with targeted metabolite profiling, of adzuki bean (*Vigna angularis*) cultivated in Korea.

**Table S4.** Composition and content (ratio/g) of hydrophilic compounds by using non-targeted metabolite profiling, which matched with targeted metabolite profiling, of adzuki bean (*Vigna angularis*) cultivated in China

**Table S5.** PLS-DA loading and VIP of variables from targeted metabolite profiling with UV-scaling.

**Table S6.** PLS-DA loading and VIP of variables from non-targeted metabolite profiling with UV-scaling.

**Table S7.** PLS-DA loading and VIP of variables from targeted metabolite profiling with pareto-scaling.

**Table S8.** PLS-DA loading and VIP of variables from non-targeted metabolite profiling with pareto-scaling

**Table S9.** Relative retention times (RRT) and mass spectral data of hydrophilic compounds as trimethylsilyl derivatives.

**Table S1.** Composition and content (ratio/g) of hydrophilic compounds by using targeted metabolite profiling of adzuki bean (*Vigna angularis*) cultivated in Korea.

| CI <sup>a</sup> | Compound          | K1          | K2           | K3           | K4           | K5           | K6           | K7          |
|-----------------|-------------------|-------------|--------------|--------------|--------------|--------------|--------------|-------------|
| 1               | Lactic acid       | 15.79±8.85  | 3.66±0.77    | 10.70±1.51   | 8.51±0.37    | 10.02±1.29   | 5.50±1.30    | 7.88±1.67   |
| 2               | Alanine           | 5.77±0.60   | 8.45±0.90    | 3.02±1.10    | 6.71±1.56    | 6.04±0.89    | 2.02±0.64    | 2.84±0.70   |
| 3               | Oxalic acid       | 50.68±13.63 | 44.75±1.97   | 39.28±6.18   | 38.72±5.29   | 39.75±1.87   | 45.65±15.53  | 38.73±2.40  |
| 4               | Glycolic acid     | 5.57±1.15   | 7.18±0.16    | 8.74±1.89    | 12.95±0.88   | 5.41±0.47    | 7.97±0.40    | 5.69±0.68   |
| 5               | Valine            | 4.38±0.52   | 4.91±0.45    | 2.21±0.79    | 4.62±0.58    | 3.79±0.32    | 1.82±0.39    | 3.06±0.45   |
| 6               | Urea              | 8.91±1.66   | 7.11±0.18    | 3.06±0.16    | 13.90±0.64   | 4.54±0.32    | 5.77±0.74    | 3.78±0.33   |
| 7               | Serine            | 0.55±0.11   | 1.69±0.21    | 0.40±0.35    | 0.79±0.07    | 0.42±0.06    | 1.28±0.30    | 1.11±0.37   |
| 8               | Ethanolamine      | 1.92±0.16   | 2.02±0.18    | 1.72±0.41    | 4.65±0.79    | 1.76±0.13    | 2.77±0.54    | 2.98±0.46   |
| 9               | Phosphoric acid   | 178.27±1.19 | 273.82±14.58 | 144.33±2.85  | 223.18±4.56  | 71.85±2.40   | 252.36±14.63 | 108.98±1.23 |
| 10              | Isoleucine        | 1.33±0.13   | 2.21±0.17    | 0.81±0.25    | 2.35±0.39    | 1.28±0.11    | 0.66±0.25    | 1.41±0.25   |
| 11              | Proline           | 6.30±0.54   | 7.39±0.52    | 9.85±3.10    | 13.70±3.41   | 6.74±0.17    | 3.44±0.90    | 7.94±1.18   |
| 12              | Glycine           | 6.13±0.41   | 7.70±0.63    | 3.48±0.30    | 8.12±1.58    | 5.33±0.55    | 5.33±0.68    | 5.11±0.16   |
| 13              | Succinic acid     | 11.75±0.35  | 9.63±0.44    | 18.70±0.83   | 9.44±0.88    | 9.28±0.45    | 10.84±0.54   | 9.15±0.25   |
| 14              | Glyceric acid     | 1.42±0.11   | 1.43±0.09    | 1.95±0.22    | 1.61±0.18    | 2.81±0.13    | 1.20±0.06    | 2.27±0.27   |
| 15              | Fumaric acid      | 0.68±0.06   | 0.45±0.04    | 0.70±0.06    | 0.56±0.10    | 0.49±0.09    | 0.34±0.07    | 0.70±0.17   |
| 16              | Threonine         | 1.16±0.01   | 1.23±0.19    | 0.64±0.18    | 0.77±0.09    | 1.01±0.13    | 0.62±0.21    | 0.73±0.04   |
| 17              | β-Alanine         | 2.74±0.62   | 1.66±0.35    | 1.39±0.08    | 3.26±0.24    | 2.00±0.11    | 1.47±0.17    | 1.33±0.18   |
| 18              | Malic acid        | 40.10±1.19  | 54.03±1.25   | 79.46±0.91   | 36.25±3.89   | 49.75±2.21   | 88.26±1.47   | 64.36±1.44  |
| 19              | Aspartic acid     | 24.90±0.92  | 32.99±0.79   | 16.1±1.93    | 22.40±1.16   | 21.66±0.46   | 11.69±1.86   | 25.18±1.48  |
| 20              | Pyroglutamic acid | 10.49±0.13  | 5.65±0.20    | 8.85±0.80    | 13.70±0.18   | 13.03±0.41   | 3.92±0.36    | 8.18±0.86   |
| 21              | Threonic acid     | 5.39±0.26   | 5.52±0.07    | 6.30±0.18    | 7.35±0.19    | 5.48±0.35    | 4.52±0.28    | 6.12±0.67   |
| 22              | Glutamic acid     | 44.38±0.61  | 67.57±2.39   | 28.67±1.20   | 36.74±1.83   | 38.78±1.38   | 21.74±0.96   | 34.69±0.85  |
| 23              | Phenylalanine     | 2.19±0.12   | 3.78±0.22    | 4.55±0.48    | 3.45±0.06    | 3.99±0.11    | 2.37±0.21    | 2.78±0.21   |
| 24              | Asparagine        | 16.27±0.17  | 11.53±0.24   | 1.60±0.35    | 7.91±0.88    | 11.64±0.62   | 1.39±0.15    | 3.22±0.62   |
| 25              | Shikimic acid     | 0.75±0.08   | 0.65±0.05    | 0.80±0.07    | 0.55±0.06    | 0.57±0.05    | 0.90±0.08    | 0.62±0.10   |
| 26              | Citric acid       | 577.93±3.91 | 601.50±12.75 | 501.94±18.97 | 547.77±37.01 | 704.56±31.02 | 436.82±21.10 | 550.76±5.77 |
| 27              | Fructose          | 5.42±1.37   | 10.31±2.80   | 17.51±3.85   | 11.02±2.26   | 9.11±0.98    | 11.55±3.27   | 7.00±1.33   |
| 28              | Galactose         | 7.56±0.61   | 6.16±1.04    | 8.02±2.34    | 5.27±1.06    | 6.76±1.42    | 6.91±1.39    | 5.50±0.24   |
| 29              | Glucose           | 2.84±0.42   | 2.40±0.18    | 3.46±0.67    | 2.29±0.18    | 2.61±0.40    | 2.65±0.50    | 2.31±0.10   |

(Continued next page)

(Table S1., continued)

| CI <sup>a</sup> | Compound   | K1          | K2          | K3          | K4          | K5          | K6           | K7           |
|-----------------|------------|-------------|-------------|-------------|-------------|-------------|--------------|--------------|
| 30              | Mannitol   | 0.72±0.16   | 1.13±0.06   | 0.53±0.13   | 0.49±0.28   | 0.44±0.14   | 0.30±0.06    | 0.37±0.16    |
| 31              | Lysine     | 2.33±0.05   | 1.97±0.13   | 0.63±0.08   | 1.32±0.12   | 1.78±0.20   | 1.13±0.22    | 0.89±0.07    |
| 32              | Tyrosine   | 4.02±0.17   | 5.09±0.09   | 1.85±0.18   | 3.15±0.31   | 2.54±0.08   | 2.69±0.32    | 2.77±0.03    |
| 33              | Inositol   | 5.82±0.47   | 6.07±0.67   | 4.69±0.08   | 9.20±0.25   | 3.98±0.35   | 4.09±0.22    | 5.20±0.17    |
| 34              | Tryptophan | 15.35±3.64  | 39.28±2.03  | 18.72±4.54  | 24.84±1.14  | 7.88±0.29   | 15.26±1.38   | 17.32±5.35   |
| 35              | Sucrose    | 322.58±2.55 | 200.17±6.68 | 216.75±5.73 | 224.99±8.39 | 193.68±1.32 | 473.18±37.99 | 274.57±17.04 |
| 36              | Raffinose  | 49.51±1.15  | 48.80±1.30  | 38.52±0.79  | 46.82±0.97  | 38.90±0.27  | 33.07±2.14   | 54.50±1.63   |

<sup>a</sup> CI, compound index

**Table S2.** Composition and content (ratio/g) of hydrophilic compounds by using targeted metabolite profiling of adzuki bean (*Vigna angularis*) cultivated in China.

| Cl <sup>a</sup> | Compound          | C1           | C2           | C3           | C4           | C5           | C6           |
|-----------------|-------------------|--------------|--------------|--------------|--------------|--------------|--------------|
| 1               | Lactic acid       | 14.58±5.56   | 15.17±3.94   | 7.70±3.74    | 7.57±3.14    | 7.31±1.96    | 5.86±1.92    |
| 2               | Alanine           | 4.56±0.86    | 3.00±0.14    | 4.61±2.47    | 10.92±2.05   | 9.75±3.44    | 4.51±0.62    |
| 3               | Oxalic acid       | 41.83±0.86   | 48.51±3.88   | 75.21±69.99  | 34.15±0.67   | 39.05±3.61   | 45.99±10.62  |
| 4               | Glycolic acid     | 8.03±0.20    | 4.40±0.19    | 8.36±1.90    | 9.89±0.87    | 7.06±1.14    | 6.60±1.18    |
| 5               | Valine            | 3.00±0.72    | 2.55±0.23    | 2.87±1.09    | 5.55±0.81    | 5.49±0.45    | 2.68±0.17    |
| 6               | Urea              | 5.01±1.20    | 3.22±0.15    | 5.91±0.88    | 10.64±0.79   | 4.16±0.48    | 4.51±0.14    |
| 7               | Serine            | 0.23±0.06    | 0.53±0.23    | 1.24±0.48    | 1.03±0.07    | 0.64±0.06    | 0.89±0.04    |
| 8               | Ethanolamine      | 3.00±0.43    | 1.96±0.14    | 2.15±0.60    | 17.05±0.95   | 2.87±0.16    | 2.33±0.28    |
| 9               | Phosphoric acid   | 104.39±0.78  | 156.52±5.89  | 225.49±13.48 | 226.27±5.08  | 219.00±8.90  | 185.98±9.45  |
| 10              | Isoleucine        | 1.00±0.16    | 1.12±0.26    | 1.40±0.30    | 2.07±0.10    | 2.81±0.08    | 1.19±0.11    |
| 11              | Proline           | 7.99±1.80    | 8.21±0.90    | 6.29±3.00    | 12.07±1.30   | 10.89±0.24   | 4.90±0.37    |
| 12              | Glycine           | 5.81±0.23    | 4.38±0.41    | 6.69±0.88    | 14.94±0.62   | 7.76±0.47    | 6.49±0.33    |
| 13              | Succinic acid     | 9.80±0.76    | 9.66±0.28    | 10.26±0.54   | 8.87±0.74    | 9.78±0.14    | 11.58±0.54   |
| 14              | Glyceric acid     | 1.45±0.34    | 1.37±0.17    | 1.59±0.15    | 2.11±0.25    | 1.24±0.26    | 1.20±0.19    |
| 15              | Fumaric acid      | 0.65±0.10    | 0.68±0.13    | 0.69±0.04    | 1.23±0.12    | 0.54±0.13    | 0.36±0.10    |
| 16              | Threonine         | 0.76±0.14    | 0.81±0.23    | 0.67±0.14    | 0.68±0.10    | 1.03±0.05    | 0.73±0.04    |
| 17              | β-Alanine         | 2.68±0.49    | 2.46±0.33    | 1.67±0.56    | 2.22±0.39    | 2.10±0.12    | 2.13±0.11    |
| 18              | Malic acid        | 36.70±0.63   | 49.35±2.14   | 56.04±1.69   | 29.70±1.51   | 57.51±4.54   | 35.64±2.88   |
| 19              | Aspartic acid     | 19.46±2.93   | 16.62±0.83   | 21.11±2.64   | 22.65±1.75   | 18.91±0.85   | 15.77±0.98   |
| 20              | Pyroglutamic acid | 12.82±0.61   | 14.17±1.21   | 10.17±1.31   | 11.39±0.67   | 10.52±0.52   | 7.68±0.38    |
| 21              | Threonic acid     | 6.22±0.45    | 5.34±0.35    | 5.67±0.50    | 5.19±0.78    | 5.20±0.29    | 5.36±0.21    |
| 22              | Glutamic acid     | 41.88±2.51   | 26.64±1.76   | 36.02±2.02   | 46.46±2.53   | 38.98±0.30   | 34.37±1.85   |
| 23              | Phenylalanine     | 2.57±0.14    | 2.39±0.18    | 2.57±0.07    | 2.27±0.29    | 2.31±0.11    | 3.55±0.07    |
| 24              | Asparagine        | 12.69±1.12   | 3.42±0.55    | 6.82±0.52    | 10.15±0.47   | 7.70±1.17    | 13.11±1.35   |
| 25              | Shikimic acid     | 0.94±0.20    | 1.62±0.49    | 0.90±0.20    | 0.54±0.12    | 0.91±0.18    | 1.14±0.47    |
| 26              | Citric acid       | 545.27±13.67 | 489.29±28.07 | 433.65±11.00 | 346.59±23.61 | 391.94±16.03 | 455.10±38.07 |
| 27              | Fructose          | 5.82±0.80    | 6.88±2.09    | 11.51±1.75   | 9.49±1.59    | 11.18±1.88   | 10.76±2.04   |
| 28              | Galactose         | 4.87±0.97    | 7.70±3.29    | 6.47±0.10    | 4.29±0.85    | 5.77±1.01    | 7.88±1.69    |
| 29              | Glucose           | 1.77±0.21    | 2.65±0.96    | 2.60±0.28    | 1.89±0.20    | 2.73±0.31    | 2.67±0.58    |

(Continued next page)

(Table S2., continued)

| CI <sup>a</sup> | Compound   | C1           | C2           | C3           | C4           | C5          | C6          |
|-----------------|------------|--------------|--------------|--------------|--------------|-------------|-------------|
| 30              | Mannitol   | 0.52±0.09    | 0.93±0.11    | 0.76±0.11    | 0.74±0.08    | 0.63±0.12   | 0.53±0.06   |
| 31              | Lysine     | 1.20±0.07    | 0.92±0.14    | 0.97±0.15    | 1.93±0.13    | 1.16±0.03   | 1.38±0.15   |
| 32              | Tyrosine   | 2.27±0.19    | 2.56±0.14    | 3.10±0.36    | 4.02±0.26    | 2.92±0.10   | 2.77±0.21   |
| 33              | Inositol   | 4.06±0.38    | 4.31±0.57    | 6.50±0.67    | 15.16±0.59   | 6.25±0.51   | 4.25±0.43   |
| 34              | Tryptophan | 37.38±4.76   | 15.39±1.09   | 7.24±2.77    | 5.07±0.20    | 13.56±1.31  | 17.55±1.18  |
| 35              | Sucrose    | 216.00±13.28 | 281.02±16.94 | 356.19±22.88 | 310.84±12.59 | 317.95±7.43 | 167.45±9.41 |
| 36              | Raffinose  | 42.09±1.10   | 39.09±1.58   | 42.99±2.21   | 72.53±3.99   | 45.08±1.96  | 46.28±2.91  |

<sup>a</sup> CI, compound index

**Table S3.** Composition and content (ratio/g) of hydrophilic compounds by using non-targeted metabolites profiling, which matched with targeted metabolite profiling, of adzuki bean (*Vigna angularis*) cultivated in Korea.

| CI <sup>a</sup> | Compound      | K1          | K2           | K3           | K4           | K5           | K6              | K7           |
|-----------------|---------------|-------------|--------------|--------------|--------------|--------------|-----------------|--------------|
| 1               | Lactic acid   | 14.84±10.06 | 1.09±1.89    | 8.17±1.07    | 6.89±0.26    | 7.71±1.22    | 4.60±0.99       | 6.54±1.09    |
| 6               | Urea          | 9.07±1.59   | 7.20±0.19    | 3.07±0.17    | 13.87±0.57   | 4.65±0.39    | 5.87±0.85       | 3.89±0.42    |
| 7               | Serine        | 2.06±0.37   | 1.37±1.20    | 1.93±0.66    | 5.24±0.56    | 0.62±1.07    | 3.02±0.81       | 3.18±0.42    |
| 8               | Ethanolamine  | 0.46±0.80   | 2.24±0.14    | 0.28±0.48    | 2.50±0.39    | 1.50±0.27    | ND <sup>b</sup> | 0.54±0.93    |
| 10              | Isoleucine    | 6.24±0.44   | 7.37±0.56    | 9.88±3.09    | 13.72±3.47   | 6.73±0.13    | 2.68±2.36       | 7.95±1.12    |
| 11              | Proline       | 6.17±0.34   | 7.79±0.50    | 3.57±0.29    | 8.15±1.43    | 5.37±0.44    | 5.44±0.70       | 5.23±0.08    |
| 12              | Glycine       | 11.38±0.38  | 9.60±0.23    | 18.94±0.78   | 9.49±0.77    | 9.46±0.51    | 10.92±0.43      | 9.15±0.28    |
| 13              | Succinic acid | 1.45±0.20   | 2.91±0.08    | 1.30±0.42    | 2.05±0.18    | 1.95±0.29    | 0.97±0.39       | 1.75±0.11    |
| 18              | Malic acid    | 39.97±1.45  | 54.04±1.24   | 79.52±0.93   | 36.55±3.91   | 49.66±2.33   | 88.80±0.36      | 64.56±1.41   |
| 19              | Aspartic acid | 34.57±0.72  | 47.54±1.14   | 23.08±2.92   | 32.24±2.17   | 30.03±1.07   | 16.73±3.23      | 35.29±2.69   |
| 21              | Threonic acid | 1.51±0.16   | 1.46±0.10    | 1.72±0.19    | 2.08±0.14    | 1.48±0.16    | 1.32±0.09       | 1.88±0.14    |
| 22              | Glutamic acid | 44.18±0.63  | 67.47±2.29   | 28.59±1.27   | 36.73±1.90   | 38.66±1.45   | 21.85±1.06      | 34.75±0.85   |
| 23              | Phenylalanine | 2.20±0.13   | 3.85±0.26    | 4.66±0.43    | 3.42±0.16    | 4.04±0.14    | 2.48±0.27       | 2.94±0.21    |
| 24              | Asparagine    | 16.18±0.14  | 11.57±0.16   | 1.73±0.41    | 8.01±0.76    | 11.77±0.60   | 1.55±0.16       | 3.36±0.63    |
| 26              | Citric acid   | 575.11±5.52 | 600.89±12.40 | 501.68±19.10 | 548.09±36.34 | 701.75±30.24 | 438.36±17.31    | 550.57±5.65  |
| 28              | Galactose     | 1.09±0.25   | 0.40±0.69    | 1.08±0.10    | 1.14±0.15    | 0.57±0.52    | ND              | 1.44±0.01    |
| 33              | Inositol      | 9.16±0.44   | 9.52±0.92    | 7.31±0.38    | 14.86±0.59   | 6.47±0.14    | 6.57±0.33       | 8.35±0.11    |
| 34              | Tryptophan    | 15.45±3.70  | 39.36±2.12   | 18.81±4.61   | 25.03±1.02   | 7.85±0.26    | 15.46±1.39      | 17.34±5.34   |
| 35              | Sucrose       | 312.87±8.91 | 196.47±6.72  | 216.15±8.87  | 225.15±8.31  | 192.83±3.43  | 452.87±31.53    | 273.73±11.65 |

<sup>a</sup> CI, compound index

<sup>b</sup> ND, not detected

**Table S4.** Composition and content (ratio/g) of hydrophilic compounds by using non-targeted metabolites profiling, which matched with targeted metabolite profiling, of adzuki bean (*Vigna angularis*) cultivated in China

| CI <sup>a</sup> | Compound      | C1              | C2           | C3           | C4           | C5           | C6           |
|-----------------|---------------|-----------------|--------------|--------------|--------------|--------------|--------------|
| 1               | Lactic acid   | 12.08±3.99      | 12.36±2.67   | 6.64±3.12    | 6.52±2.26    | 6.10±1.49    | 5.02±1.09    |
| 6               | Urea          | 5.07±1.19       | 3.40±0.10    | 5.99±0.94    | 10.81±0.90   | 4.28±0.54    | 4.60±0.25    |
| 7               | Serine        | 3.10±0.61       | 1.33±1.15    | 1.82±1.58    | 17.43±1.06   | 3.10±0.44    | 2.62±0.58    |
| 8               | Ethanolamine  | ND <sup>b</sup> | ND           | 0.58±1.01    | 2.11±0.11    | 2.84±0.10    | 0.90±0.78    |
| 10              | Isoleucine    | 8.00±1.80       | 8.29±0.83    | 4.83±4.90    | 12.16±1.41   | 10.93±0.24   | 4.92±0.32    |
| 11              | Proline       | 5.90±0.22       | 4.49±0.46    | 6.76±0.90    | 14.95±0.62   | 7.80±0.48    | 6.42±0.28    |
| 12              | Glycine       | 9.76±0.84       | 9.59±0.37    | 10.35±0.50   | 8.83±0.74    | 9.69±0.16    | 11.54±0.68   |
| 13              | Succinic acid | 0.67±0.59       | 1.31±1.14    | 1.18±1.16    | 2.59±0.35    | 2.22±0.11    | 1.13±0.18    |
| 18              | Malic acid    | 36.66±0.91      | 49.55±1.91   | 56.08±1.48   | 29.66±1.72   | 57.28±4.47   | 35.64±2.69   |
| 19              | Aspartic acid | 27.89±3.22      | 23.42±1.90   | 30.68±3.15   | 32.66±2.21   | 27.16±0.94   | 22.53±0.61   |
| 21              | Threonic acid | 1.76±0.21       | 1.41±0.05    | 1.65±0.03    | 1.47±0.18    | 1.41±0.17    | 1.59±0.05    |
| 22              | Glutamic acid | 41.80±2.60      | 26.73±1.88   | 35.92±2.11   | 46.42±2.61   | 38.97±0.32   | 34.31±1.76   |
| 23              | Phenylalanine | 2.75±0.20       | 1.63±1.43    | 1.73±1.50    | 2.38±0.28    | 2.35±0.20    | 3.57±0.11    |
| 24              | Asparagine    | 12.73±1.23      | 3.44±0.55    | 6.80±0.54    | 10.21±0.38   | 7.75±1.25    | 13.14±1.23   |
| 26              | Citric acid   | 543.33±12.29    | 489.22±28.12 | 432.49±12.36 | 345.73±23.60 | 391.04±16.51 | 454.05±37.16 |
| 28              | Galactose     | 0.29±0.50       | 0.61±0.54    | 1.40±0.11    | 2.10±0.23    | 1.80±0.12    | 0.72±0.63    |
| 33              | Inositol      | 6.08±0.51       | 6.37±0.65    | 10.44±0.80   | 24.32±1.01   | 9.55±0.56    | 6.54±0.50    |
| 34              | Tryptophan    | 37.49±4.60      | 15.51±1.06   | 7.29±2.76    | 5.15±0.14    | 13.57±1.42   | 17.65±1.19   |
| 35              | Sucrose       | 215.48±13.32    | 280.74±16.33 | 351.99±19.97 | 304.23±12.53 | 312.81±6.59  | 163.35±9.19  |

<sup>a</sup> CI, compound index

<sup>b</sup> ND, not detected



**Table S5.** OPLS-DA loading and VIP of variables from targeted metabolite profiling with UV-scaling.

| Metabolite name   | CI <sup>a</sup> | MSI Lv. <sup>b</sup> | OPLS 1   | OPLS 2   | VIP      |
|-------------------|-----------------|----------------------|----------|----------|----------|
| Lactic acid       | 1               | Lv. 1                | 0.106342 | -0.04487 | 0.618997 |
| Alanine           | 2               | Lv. 1                | 0.03682  | 0.247723 | 0.932848 |
| Oxalic acid       | 3               | Lv. 1                | 0.047531 | -0.04855 | 0.320792 |
| Glycolic acid     | 4               | Lv. 1                | -0.02809 | 0.148835 | 0.568816 |
| Valine            | 5               | Lv. 1                | -0.0149  | 0.261748 | 0.964813 |
| Urea              | 6               | Lv. 1                | -0.04564 | 0.25675  | 0.976994 |
| Serine            | 7               | Lv. 1                | -0.09816 | 0.075711 | 0.616975 |
| Ethanolamine      | 8               | Lv. 1                | 0.174015 | 0.245597 | 1.32916  |
| Phosphoric acid   | 9               | Lv. 1                | 0.028024 | 0.124504 | 0.483484 |
| Isoleucine        | 10              | Lv. 1                | 0.003788 | 0.216767 | 0.796292 |
| Proline           | 11              | Lv. 1                | 0.035277 | 0.171144 | 0.658902 |
| Glycine           | 12              | Lv. 1                | 0.139781 | 0.282461 | 1.30038  |
| Succinic acid     | 13              | Lv. 1                | -0.11368 | -0.14653 | 0.834493 |
| Glyceric acid     | 14              | Lv. 1                | -0.16602 | 0.062191 | 0.959069 |
| Fumaric acid      | 15              | Lv. 1                | 0.175265 | 0.173546 | 1.17182  |
| Threonine         | 16              | Lv. 1                | -0.16112 | 0.074106 | 0.944081 |
| β-Alanine         | 17              | Lv. 1                | 0.126167 | 0.116685 | 0.827479 |
| Malic acid        | 18              | Lv. 1                | -0.16833 | -0.17331 | 1.13887  |
| Aspartic acid     | 19              | Lv. 1                | -0.21853 | 0.188989 | 1.40891  |
| Pyroglutamic acid | 20              | Lv. 1                | 0.176867 | 0.059258 | 1.01595  |
| Threonic acid     | 21              | Lv. 1                | -0.13672 | 0.045836 | 0.785382 |
| Glutamic acid     | 22              | Lv. 1                | -0.15274 | 0.192444 | 1.11077  |
| Phenylalanine     | 23              | Lv. 1                | -0.30755 | -0.07568 | 1.74784  |
| Asparagine        | 24              | Lv. 1                | -0.01533 | 0.131616 | 0.490909 |
| Shikimic acid     | 25              | Lv. 1                | 0.25839  | -0.17737 | 1.58936  |
| Citric acid       | 26              | Lv. 1                | -0.32861 | -0.04269 | 1.85041  |
| Fructose          | 27              | Lv. 1                | -0.06119 | -0.09151 | 0.480421 |
| Galactose         | 28              | Lv. 1                | -0.05832 | -0.1739  | 0.717562 |
| Glucose           | 29              | Lv. 1                | -0.10866 | -0.14552 | 0.810715 |
| Mannitol          | 30              | Lv. 1                | 0.064955 | 0.067613 | 0.440988 |
| Lysine            | 31              | Lv. 1                | -0.09784 | 0.201726 | 0.922015 |
| Tyrosine          | 32              | Lv. 1                | -0.10108 | 0.220439 | 0.988402 |
| Inositol          | 33              | Lv. 1                | 0.120004 | 0.27874  | 1.22519  |
| Tryptophan        | 34              | Lv. 1                | -0.15403 | -0.01806 | 0.866771 |
| Sucrose           | 35              | Lv. 1                | 0.121299 | 0.013564 | 0.682407 |
| Raffinose         | 36              | Lv. 1                | 0.088481 | 0.262508 | 1.0843   |

<sup>a</sup> CI, compound index<sup>b</sup> MSI Lv., metabolomics standard initiative level

**Table S6.** OPLS-DA loading and VIP of variables from non-targeted metabolite profiling with UV-scaling

| Metabolite name                                         | MT <sup>a</sup> | CI <sup>b</sup> | MSI Lv. <sup>c</sup> | OPLS 1   | OPLS 2   | VIP 1    |
|---------------------------------------------------------|-----------------|-----------------|----------------------|----------|----------|----------|
| Lactic acid                                             | T <sup>d</sup>  | 1               | Lv. 1                | 0.051864 | -0.01266 | 0.478799 |
| Urea                                                    | T               | 6               | Lv. 1                | -0.0632  | 0.161111 | 1.15128  |
| Serine                                                  | T               | 7               | Lv. 1                | -0.03756 | 0.105895 | 0.739257 |
| Ethanolamine                                            | T               | 8               | Lv. 1                | 0.093433 | 0.178195 | 1.39292  |
| Isoleucine                                              | T               | 10              | Lv. 1                | 0.010079 | 0.092045 | 0.57698  |
| Proline                                                 | T               | 11              | Lv. 1                | 0.018915 | 0.162543 | 1.02056  |
| Glycine                                                 | T               | 12              | Lv. 1                | 0.095095 | 0.184213 | 1.4317   |
| Succinic acid                                           | T               | 13              | Lv. 1                | -0.06821 | -0.04405 | 0.678382 |
| Malic acid                                              | T               | 18              | Lv. 1                | -0.12352 | -0.07121 | 1.2082   |
| Aspartic acid                                           | T               | 19              | Lv. 1                | -0.11514 | 0.046174 | 1.08691  |
| Threonic acid                                           | T               | 21              | Lv. 1                | -0.05284 | 0.027222 | 0.509842 |
| Glutamic acid                                           | T               | 22              | Lv. 1                | -0.05492 | 0.036623 | 0.549175 |
| Phenylalanine                                           | T               | 23              | Lv. 1                | -0.16582 | -0.06387 | 1.56108  |
| Asparagine                                              | T               | 24              | Lv. 1                | 0.034713 | 0.017721 | 0.334628 |
| Citric acid                                             | T               | 26              | Lv. 1                | -0.19944 | -0.08729 | 1.895    |
| Galactose                                               | T               | 28              | Lv. 1                | 0.143397 | 0.143125 | 1.57802  |
| Inositol                                                | T               | 33              | Lv. 1                | 0.044777 | 0.21265  | 1.37775  |
| Tryptophan                                              | T               | 34              | Lv. 1                | -0.0666  | -0.10178 | 0.874443 |
| Sucrose                                                 | T               | 35              | Lv. 1                | 0.045546 | 0.05207  | 0.525271 |
| Butanedioic acid                                        | A <sup>e</sup>  | 37              | Lv. 2                | -0.02937 | -0.12602 | 0.824444 |
| Ethylene glycol                                         | A               | 38              | Lv. 2                | 0.104401 | -0.01054 | 0.953066 |
| 1,3-Propanediol                                         | A               | 39              | Lv. 2                | -0.00221 | -0.13361 | 0.827105 |
| Propane                                                 | A               | 40              | Lv. 2                | 0.107096 | -0.08417 | 1.10576  |
| Hydroxylamine                                           | A               | 41              | Lv. 2                | 0.076587 | -0.06343 | 0.800393 |
| N,O,O-tri(trimethylsilyl)-<br>1-c(13)-N-carboxy-glycine | A               | 42              | Lv. 2                | 0.032642 | -0.04597 | 0.4115   |
| 1,4-Butanediol                                          | A               | 43              | Lv. 2                | 0.047661 | -0.0104  | 0.438814 |
| Norvaline                                               | A               | 44              | Lv. 2                | 0.001568 | 0.159663 | 0.988193 |
| Glycerol                                                | A               | 45              | Lv. 2                | 0.026429 | 0.188508 | 1.19118  |
| 5-Methoxy-3-chromanol                                   | A               | 46              | Lv. 2                | 0.13129  | 0.011624 | 1.19789  |
| Propanoic acid                                          | A               | 47              | Lv. 2                | 0.138516 | -0.00673 | 1.26222  |
| Pipecolic acid                                          | A               | 48              | Lv. 2                | -0.09873 | 0.084176 | 1.03917  |
| L-Aspartic acid                                         | A               | 49              | Lv. 2                | -0.0289  | -0.01464 | 0.278336 |
| D-(-)-Erythrose                                         | A               | 50              | Lv. 2                | 0.195692 | -0.03517 | 1.79551  |
| 2-Methoxy-3-methoxy<br>carbonyl-1,3-pentadiene          | A               | 51              | Lv. 2                | 0.117786 | 0.068522 | 1.15351  |
| Suberylglycine                                          | A               | 52              | Lv. 2                | -0.00195 | -0.03158 | 0.196215 |
| L-(+)-Tartaric acid                                     | A               | 53              | Lv. 2                | -0.06516 | -0.07279 | 0.745019 |
| D-Ribose                                                | A               | 54              | Lv. 2                | -0.02257 | -0.02998 | 0.276922 |
| D-Galactose                                             | A               | 55              | Lv. 2                | -0.10794 | -0.07722 | 1.09303  |
| Allantoin                                               | A               | 56              | Lv. 2                | -0.07867 | -0.02631 | 0.734773 |
| L-Histidine                                             | A               | 57              | Lv. 2                | -0.12547 | -0.11073 | 1.33246  |
| 3-(2-fluorophenyl)spiro<br>[oxirane-2,2'-norbornane]    | A               | 58              | Lv. 2                | -0.07862 | 0.060432 | 0.807857 |
| D-Pinitol                                               | A               | 59              | Lv. 2                | -0.01889 | 0.018008 | 0.204951 |

(Continued next page)

(Table S6, continued)

| Metabolite name                                                          | MT <sup>a</sup> | CI <sup>b</sup> | MSI Lv. <sup>c</sup> | OPLS 1   | OPLS 2   | VIP 1    |
|--------------------------------------------------------------------------|-----------------|-----------------|----------------------|----------|----------|----------|
| D-(+)-Talopyranose                                                       | A               | 60              | Lv. 2                | -0.13858 | -0.00992 | 1.26359  |
| Ribonic acid, 2,3,4,5-tetrakis-O-(trimethylsilyl)-, trimethylsilyl ester | A               | 61              | Lv. 2                | 0.072576 | 0.202773 | 1.41832  |
| Galacturonic acid                                                        | A               | 62              | Lv. 2                | -0.07406 | -0.024   | 0.690639 |
| Pentadecanoic acid                                                       | A               | 63              | Lv. 2                | 0.031247 | 0.070168 | 0.519189 |
| Tris(trimethylsilyl)amine                                                | A               | 64              | Lv. 2                | -0.02363 | -0.08724 | 0.581214 |
| Ethyl D-glucopyranoside                                                  | A               | 65              | Lv. 2                | 0.142101 | -0.00383 | 1.2944   |
| Cyclohexanecarboxylic acid                                               | A               | 66              | Lv. 2                | 0.043722 | -0.12444 | 0.866949 |
| Bis(2-ethylhexyl) phthalate                                              | A               | 67              | Lv. 2                | -0.07416 | -0.06832 | 0.796828 |
| (2,3-Diphenylcyclopropyl) methyl phenyl sulfoxide1                       | A               | 68              | Lv. 2                | -0.03341 | -0.14623 | 0.954751 |
| (2,3-Diphenylcyclopropyl) methyl phenyl sulfoxide2                       | A               | 69              | Lv. 2                | -0.0536  | -0.15586 | 1.08104  |
| Tetracyclo[4.3.0.0(2,7)] nonane-7,7,8,8-tetracarbonitrile                | A               | 70              | Lv. 2                | -0.05378 | -0.07597 | 0.67891  |
| Methyl galactoside (1S,2R,3S,4R,5R)-                                     | A               | 71              | Lv. 2                | 0.101595 | -0.01719 | 0.931373 |
| D-Galactoside                                                            | A               | 72              | Lv. 2                | 0.074345 | 0.050069 | 0.744626 |
| D-Glucopyranose                                                          | A               | 73              | Lv. 2                | 0.01459  | -0.17575 | 1.09571  |
| D-Galactose1                                                             | A               | 74              | Lv. 2                | -0.05193 | -0.03828 | 0.528941 |
| D-Galactose2                                                             | A               | 75              | Lv. 2                | -0.07834 | -0.15395 | 1.19027  |
| Dimethyl hexopyranosiduronate                                            | A               | 76              | Lv. 2                | 0.053042 | -0.03659 | 0.533515 |
| Analyte 1                                                                | A               | A1              | Lv. 3                | 0.070551 | -0.06526 | 0.758919 |
| Analyte 2                                                                | A               | A2              | Lv. 3                | 0.027076 | -0.14568 | 0.93465  |
| Analyte 3                                                                | A               | A3              | Lv. 3                | 0.014231 | -0.1355  | 0.848486 |
| Analyte 4                                                                | A               | A4              | Lv. 3                | 0.169871 | 0.018552 | 1.55135  |
| Analyte 5                                                                | A               | A5              | Lv. 3                | -0.02621 | -0.03166 | 0.308798 |
| Analyte 6                                                                | A               | A6              | Lv. 3                | 0.09068  | 0.127063 | 1.14035  |
| Analyte 7                                                                | A               | A7              | Lv. 3                | 0.057617 | -0.15033 | 1.06812  |
| Analyte 8                                                                | A               | A8              | Lv. 3                | -0.04199 | -0.11182 | 0.790637 |
| Analyte 9                                                                | A               | A9              | Lv. 3                | -0.02519 | 0.151103 | 0.962854 |
| Analyte 10                                                               | A               | A10             | Lv. 3                | 0.075405 | -0.06724 | 0.802995 |
| Analyte 11                                                               | A               | A11             | Lv. 3                | 0.13748  | -0.0253  | 1.26185  |
| Analyte 12                                                               | A               | A12             | Lv. 3                | -0.09436 | 0.059648 | 0.935273 |
| Analyte 13                                                               | A               | A13             | Lv. 3                | -0.13918 | -0.04533 | 1.29827  |
| Analyte 14                                                               | A               | A14             | Lv. 3                | -0.0397  | -0.08942 | 0.661015 |
| Analyte 15                                                               | A               | A15             | Lv. 3                | -0.00107 | -0.10727 | 0.663949 |
| Analyte 16                                                               | A               | A16             | Lv. 3                | -0.11513 | 0.060933 | 1.11432  |
| Analyte 17                                                               | A               | A17             | Lv. 3                | -0.10006 | -0.04472 | 0.952433 |
| Analyte 18                                                               | A               | A18             | Lv. 3                | 0.079012 | 0.041973 | 0.765048 |
| Analyte 19                                                               | A               | A19             | Lv. 3                | 0.045397 | -0.13678 | 0.942076 |

(Continued next page)

(Table S6, continued)

| Metabolite name | MT <sup>a</sup> | CI <sup>b</sup> | MSI Lv. <sup>c</sup> | OPLS 1   | OPLS 2   | VIP 1    |
|-----------------|-----------------|-----------------|----------------------|----------|----------|----------|
| Analyte 20      | A               | A20             | Lv. 3                | -0.2268  | -0.08097 | 2.12546  |
| Analyte 21      | A               | A21             | Lv. 3                | -0.08346 | 0.055368 | 0.833751 |
| Analyte 22      | A               | A22             | Lv. 3                | 0.100241 | -0.10141 | 1.10786  |
| Analyte 23      | A               | A23             | Lv. 3                | 0.023844 | -0.0808  | 0.545134 |
| Analyte 24      | A               | A24             | Lv. 3                | -0.08741 | -0.13484 | 1.15326  |
| Analyte 25      | A               | A25             | Lv. 3                | 0.106088 | -0.16604 | 1.41047  |
| Analyte 26      | A               | A26             | Lv. 3                | 0.075807 | 0.044955 | 0.744354 |
| Analyte 27      | A               | A27             | Lv. 3                | 0.04154  | 0.016604 | 0.392035 |
| Analyte 28      | A               | A28             | Lv. 3                | 0.193454 | 0.036014 | 1.77592  |
| Analyte 29      | A               | A29             | Lv. 3                | 0.021215 | -0.10656 | 0.687177 |
| Analyte 30      | A               | A30             | Lv. 3                | -0.09143 | -0.05139 | 0.891395 |
| Analyte 31      | A               | A31             | Lv. 3                | 0.005233 | -0.03018 | 0.192736 |
| Analyte 32      | A               | A32             | Lv. 3                | -0.05484 | 0.066055 | 0.645435 |
| Analyte 33      | A               | A33             | Lv. 3                | -0.06773 | -0.0519  | 0.695424 |
| Analyte 34      | A               | A34             | Lv. 3                | -0.0241  | -0.07808 | 0.530714 |
| Analyte 35      | A               | A35             | Lv. 3                | -0.06769 | -0.0587  | 0.715564 |
| Analyte 36      | A               | A36             | Lv. 3                | -0.11547 | -0.1112  | 1.25679  |
| Analyte 37      | A               | A37             | Lv. 3                | -0.00451 | -0.10926 | 0.677382 |
| Analyte 38      | A               | A38             | Lv. 3                | -0.12702 | 0.052375 | 1.20138  |
| Analyte 39      | A               | A39             | Lv. 3                | -0.0491  | -0.118   | 0.856288 |
| Analyte 40      | A               | A40             | Lv. 3                | -0.12389 | -0.03641 | 1.15062  |
| Analyte 41      | A               | A41             | Lv. 3                | 0.105268 | -0.04052 | 0.990982 |
| Analyte 42      | A               | A42             | Lv. 3                | 0.152641 | -0.04983 | 1.42398  |
| Analyte 43      | A               | A43             | Lv. 3                | 0.14626  | 0.071931 | 1.40448  |
| Analyte 44      | A               | A44             | Lv. 3                | -0.11821 | -0.11822 | 1.30165  |
| Analyte 45      | A               | A45             | Lv. 3                | -0.03817 | 0.003995 | 0.34851  |
| Analyte 46      | A               | A46             | Lv. 3                | -0.02274 | -0.1538  | 0.974086 |
| Analyte 47      | A               | A47             | Lv. 3                | 0.026273 | -0.14998 | 0.958542 |
| Analyte 48      | A               | A48             | Lv. 3                | 0.102345 | -0.05745 | 0.997604 |
| Analyte 49      | A               | A49             | Lv. 3                | 0.141103 | -0.04599 | 1.31624  |
| Analyte 50      | A               | A50             | Lv. 3                | -0.01586 | -0.02083 | 0.193614 |
| Analyte 51      | A               | A51             | Lv. 3                | 0.025712 | -0.07669 | 0.529219 |
| Analyte 52      | A               | A52             | Lv. 3                | -0.04446 | -0.12557 | 0.876273 |

<sup>a</sup> MT, metabolite profiling type

<sup>b</sup> CI, compound index

<sup>c</sup> MSI Lv., metabolomics standard initiative level

<sup>d</sup> T, identified compounds by targeted metabolite profiling

<sup>e</sup> A, automatically identified compounds by non-targeted metabolite profiling

**Table S7.** OPLS-DA loading and VIP of variables from targeted metabolite profiling with pareto-scaling.

| Metabolite name   | CI <sup>a</sup> | MSI Lv. <sup>b</sup> | OPLS 1    | OPLS 2   | VIP 1    |
|-------------------|-----------------|----------------------|-----------|----------|----------|
| Lactic acid       | 1               | Lv. 1                | -0.00166  | -0.05611 | 0.196537 |
| Alanine           | 2               | Lv. 1                | 0.066953  | 0.004189 | 0.328412 |
| Oxalic acid       | 3               | Lv. 1                | -6.48E-05 | 0.059424 | 0.207978 |
| Glycolic acid     | 4               | Lv. 1                | 0.033658  | 0.031306 | 0.198009 |
| Valine            | 5               | Lv. 1                | 0.024797  | -0.00131 | 0.121595 |
| Urea              | 6               | Lv. 1                | 0.008847  | 0.026914 | 0.103695 |
| Serine            | 7               | Lv. 1                | -0.01182  | 0.029176 | 0.11739  |
| Ethanolamine      | 8               | Lv. 1                | 0.134906  | 0.035028 | 0.67234  |
| Phosphoric acid   | 9               | Lv. 1                | 0.084447  | 0.489669 | 1.76304  |
| Isoleucine        | 10              | Lv. 1                | 0.021918  | 0.005705 | 0.109244 |
| Proline           | 11              | Lv. 1                | 0.072573  | -0.01804 | 0.361184 |
| Glycine           | 12              | Lv. 1                | 0.09799   | 0.033229 | 0.494056 |
| Succinic acid     | 13              | Lv. 1                | -0.01523  | -0.00137 | 0.074778 |
| Glyceric acid     | 14              | Lv. 1                | -0.01579  | -0.02374 | 0.113549 |
| Fumaric acid      | 15              | Lv. 1                | 0.027061  | 0.000993 | 0.13265  |
| Threonine         | 16              | Lv. 1                | -0.02     | -0.00834 | 0.102278 |
| β-Alanine         | 17              | Lv. 1                | 0.016614  | -0.01719 | 0.101223 |
| Malic acid        | 18              | Lv. 1                | -0.24132  | 0.165889 | 1.31735  |
| Aspartic acid     | 19              | Lv. 1                | -0.08129  | -0.04363 | 0.42663  |
| Pyroglutamic acid | 20              | Lv. 1                | 0.05981   | -0.07401 | 0.39113  |
| Threonic acid     | 21              | Lv. 1                | -0.00404  | -0.02915 | 0.103934 |
| Glutamic acid     | 22              | Lv. 1                | -0.04621  | -0.05543 | 0.298156 |
| Phenylalanine     | 23              | Lv. 1                | -0.03545  | -0.03386 | 0.210294 |
| Asparagine        | 24              | Lv. 1                | 0.020858  | -0.07794 | 0.291289 |
| Shikimic acid     | 25              | Lv. 1                | 0.01603   | 0.000765 | 0.078596 |
| Citric acid       | 26              | Lv. 1                | -0.89757  | -0.50135 | 4.7354   |
| Fructose          | 27              | Lv. 1                | 0.017249  | 0.034306 | 0.146834 |
| Galactose         | 28              | Lv. 1                | -0.02441  | -0.00611 | 0.121496 |
| Glucose           | 29              | Lv. 1                | -0.01485  | 0.003973 | 0.074068 |
| Mannitol          | 30              | Lv. 1                | 0.003067  | 0.000966 | 0.015403 |
| Lysine            | 31              | Lv. 1                | -0.01337  | -0.00553 | 0.068304 |
| Tyrosine          | 32              | Lv. 1                | -0.01476  | 0.01837  | 0.096763 |
| Inositol          | 33              | Lv. 1                | 0.102869  | 0.037753 | 0.521113 |
| Tryptophan        | 34              | Lv. 1                | -0.10894  | -0.07205 | 0.590378 |
| Sucrose           | 35              | Lv. 1                | -0.08918  | 0.664626 | 2.36681  |
| Raffinose         | 36              | Lv. 1                | 0.173234  | 0.003957 | 0.848999 |

<sup>a</sup> CI, compound index

<sup>b</sup> MSI Lv., metabolomics standard initiative level

**Table S8.** OPLS-DA loading and VIP of variables from non-targeted metabolite profiling with pareto-scaling

| Metabolite name                                          | MT <sup>a</sup> | CI <sup>b</sup> | MSI Lv. <sup>c</sup> | OPLS 1   | OPLS 2   | VIP 1    |
|----------------------------------------------------------|-----------------|-----------------|----------------------|----------|----------|----------|
| Lactic acid                                              | T <sup>d</sup>  | 1               | Lv. 1                | -0.0216  | -0.03488 | 0.283015 |
| Urea                                                     | T               | 6               | Lv. 1                | -0.01072 | 0.036714 | 0.242736 |
| Serine                                                   | T               | 7               | Lv. 1                | 0.004458 | -0.01047 | 0.074674 |
| Ethanolamine                                             | T               | 8               | Lv. 1                | 0.109225 | 0.065939 | 1.02375  |
| Isoleucine                                               | T               | 10              | Lv. 1                | 0.008351 | 0.020336 | 0.143657 |
| Proline                                                  | T               | 11              | Lv. 1                | 0.042337 | 0.023998 | 0.393151 |
| Glycine                                                  | T               | 12              | Lv. 1                | 0.085531 | 0.034745 | 0.766887 |
| Succinic acid                                            | T               | 13              | Lv. 1                | -0.03428 | 0.020736 | 0.321381 |
| Malic acid                                               | T               | 18              | Lv. 1                | -0.25134 | 0.143312 | 2.33595  |
| Aspartic acid                                            | T               | 19              | Lv. 1                | -0.08014 | -0.08763 | 0.873986 |
| Threonic acid                                            | T               | 21              | Lv. 1                | -0.00414 | -0.00723 | 0.056812 |
| Glutamic acid                                            | T               | 22              | Lv. 1                | -0.00372 | -0.11836 | 0.724427 |
| Phenylalanine                                            | T               | 23              | Lv. 1                | -0.0323  | -0.03482 | 0.350402 |
| Asparagine                                               | T               | 24              | Lv. 1                | 0.047543 | -0.09193 | 0.695516 |
| Citric acid                                              | T               | 26              | Lv. 1                | -0.77563 | -0.57343 | 7.54625  |
| Galactose                                                | T               | 28              | Lv. 1                | 0.024298 | 0.036061 | 0.304036 |
| Inositol                                                 | T               | 33              | Lv. 1                | 0.087718 | 0.070135 | 0.868911 |
| Tryptophan                                               | T               | 34              | Lv. 1                | -0.0641  | -0.11676 | 0.902569 |
| Sucrose                                                  | T               | 35              | Lv. 1                | -0.11978 | 0.612162 | 3.8827   |
| Butanedioic acid                                         | A               | 37              | Lv. 2                | -0.0314  | -0.01022 | 0.277611 |
| Ethylene glycol                                          | A               | 38              | Lv. 2                | 0.029306 | -0.00972 | 0.259382 |
| 1,3-Propanediol                                          | A               | 39              | Lv. 2                | -0.07024 | -0.0646  | 0.722677 |
| Propane                                                  | A               | 40              | Lv. 2                | 0.026729 | 0.065833 | 0.46375  |
| Hydroxylamine                                            | A               | 41              | Lv. 2                | 0.008733 | -0.02792 | 0.186544 |
| N,O,O-tri(trimethylsilyl)-<br>-1-c(13)-N-carboxy-glycine | A               | 42              | Lv. 2                | 0.049055 | 0.023371 | 0.44613  |
| 1,4-Butanediol                                           | A               | 43              | Lv. 2                | -0.0116  | -0.01275 | 0.126755 |
| Norvaline                                                | A               | 44              | Lv. 2                | 0.017415 | -0.00013 | 0.150036 |
| Glycerol                                                 | A               | 45              | Lv. 2                | 0.021154 | 0.046498 | 0.337704 |
| 5-Methoxy-3-chromanol                                    | A               | 46              | Lv. 2                | 0.005207 | 0.033749 | 0.211178 |
| Propanoic acid                                           | A               | 47              | Lv. 2                | 0.009415 | 0.030487 | 0.203295 |
| Pipecolic acid                                           | A               | 48              | Lv. 2                | -0.17265 | -0.13566 | 1.70312  |
| L-Aspartic acid                                          | A               | 49              | Lv. 2                | -0.00364 | -0.00117 | 0.032142 |
| D-(-)-Erythrose                                          | A               | 50              | Lv. 2                | 0.01901  | 0.005782 | 0.167548 |
| 2-Methoxy-3-methoxy<br>carbonyl-1,3-pentadiene           | A               | 51              | Lv. 2                | 0.065919 | -0.04513 | 0.631387 |
| Suberylglycine                                           | A               | 52              | Lv. 2                | -0.00281 | -0.00623 | 0.045172 |
| L-(+)-Tartaric acid                                      | A               | 53              | Lv. 2                | -0.03109 | -0.14922 | 0.950894 |
| D-Ribose                                                 | A               | 54              | Lv. 2                | 0.014142 | 0.022936 | 0.185773 |
| D-Galactose                                              | A               | 55              | Lv. 2                | -0.02736 | 0.006438 | 0.238947 |
| Allantoin                                                | A               | 56              | Lv. 2                | -0.02163 | -0.05943 | 0.408371 |
| L-Histidine                                              | A               | 57              | Lv. 2                | -0.05534 | -0.1211  | 0.880679 |
| 3-(2-fluorophenyl)spiro<br>[oxirane-2,2'-norbornane]     | A               | 58              | Lv. 2                | -0.01409 | -0.00019 | 0.121414 |
| D-Pinitol                                                | A               | 59              | Lv. 2                | 0.06177  | -0.07727 | 0.711653 |

(Continued next page)

(Table S8, continued)

| Metabolite name                                                          | MT <sup>a</sup> | CP <sup>b</sup> | MSI Lv. | OPLS 1   | OPLS 2   | VIP 1    |
|--------------------------------------------------------------------------|-----------------|-----------------|---------|----------|----------|----------|
| D-(+)-Talopyranose                                                       | A               | 60              | Lv. 2   | -0.02341 | -0.0012  | 0.201818 |
| Ribonic acid, 2,3,4,5-tetrakis-O-(trimethylsilyl)-, trimethylsilyl ester | A               | 61              | Lv. 2   | 0.059434 | 0.035899 | 0.557105 |
| Galacturonic acid                                                        | A               | 62              | Lv. 2   | -0.14743 | 0.12798  | 1.49183  |
| Pentadecanoic acid                                                       | A               | 63              | Lv. 2   | -0.00747 | 0.034847 | 0.222587 |
| Tris(trimethylsilyl)amine                                                | A               | 64              | Lv. 2   | -0.0785  | -0.08667 | 0.85923  |
| Ethyl D-glucopyranoside                                                  | A               | 65              | Lv. 2   | 0.061589 | -0.03732 | 0.577602 |
| Cyclohexanecarboxylic acid                                               | A               | 66              | Lv. 2   | -0.01628 | -0.04479 | 0.307694 |
| Bis(2-ethylhexyl) phthalate                                              | A               | 67              | Lv. 2   | -0.16374 | 0.020172 | 1.41606  |
| (2,3-Diphenylcyclopropyl) methyl phenyl sulfoxide1                       | A               | 68              | Lv. 2   | -0.03493 | -0.02873 | 0.348434 |
| (2,3-Diphenylcyclopropyl) methyl phenyl sulfoxide2                       | A               | 69              | Lv. 2   | -0.04273 | -0.04749 | 0.468876 |
| Tetracyclo[4.3.0.0(2,7)]nonane-7,7,8,8-tetracarbonitrile                 | A               | 70              | Lv. 2   | -0.02062 | -0.00527 | 0.180534 |
| Methyl galactoside (1S,2R,3S,4R,5R)-                                     | A               | 71              | Lv. 2   | 0.02624  | 0.001733 | 0.226316 |
| D-Galactoside                                                            | A               | 72              | Lv. 2   | 0.047089 | 0.008429 | 0.408949 |
| D-Glucopyranose                                                          | A               | 73              | Lv. 2   | -0.12125 | -0.18603 | 1.54439  |
| D-Galactose1                                                             | A               | 74              | Lv. 2   | -0.20828 | 0.04223  | 1.81291  |
| D-Galactose2                                                             | A               | 75              | Lv. 2   | -0.10397 | -0.00176 | 0.895806 |
| Dimethyl hexopyranosiduronate                                            | A               | 76              | Lv. 2   | 0.023005 | -0.11856 | 0.751504 |
| Analyte 1                                                                | A               | A1              | Lv. 3   | 0.000837 | -0.03898 | 0.238431 |
| Analyte 2                                                                | A               | A2              | Lv. 3   | -0.01697 | -0.01198 | 0.163544 |
| Analyte 3                                                                | A               | A3              | Lv. 3   | -0.03227 | -0.03816 | 0.362906 |
| Analyte 4                                                                | A               | A4              | Lv. 3   | 0.037834 | -0.0026  | 0.326342 |
| Analyte 5                                                                | A               | A5              | Lv. 3   | -0.00559 | 0.001226 | 0.048736 |
| Analyte 6                                                                | A               | A6              | Lv. 3   | 0.03851  | -0.00557 | 0.333522 |
| Analyte 7                                                                | A               | A7              | Lv. 3   | -0.00316 | -0.02032 | 0.127176 |
| Analyte 8                                                                | A               | A8              | Lv. 3   | -0.02367 | -0.01136 | 0.215408 |
| Analyte 9                                                                | A               | A9              | Lv. 3   | 0.028696 | 0.043912 | 0.364979 |
| Analyte 10                                                               | A               | A10             | Lv. 3   | 0.011865 | -0.0099  | 0.118788 |
| Analyte 11                                                               | A               | A11             | Lv. 3   | 0.017469 | 0.014907 | 0.175951 |
| Analyte 12                                                               | A               | A12             | Lv. 3   | -0.00856 | 0.02413  | 0.164939 |
| Analyte 13                                                               | A               | A13             | Lv. 3   | -0.09701 | -0.03666 | 0.86528  |
| Analyte 14                                                               | A               | A14             | Lv. 3   | -0.01533 | 0.00534  | 0.136065 |
| Analyte 15                                                               | A               | A15             | Lv. 3   | -0.00996 | -0.0137  | 0.119884 |
| Analyte 16                                                               | A               | A16             | Lv. 3   | -0.01538 | -0.02064 | 0.182968 |
| Analyte 17                                                               | A               | A17             | Lv. 3   | -0.01922 | -0.02118 | 0.210256 |
| Analyte 18                                                               | A               | A18             | Lv. 3   | 0.014929 | -0.01372 | 0.153568 |
| Analyte 19                                                               | A               | A19             | Lv. 3   | -0.00234 | -0.01556 | 0.09728  |
| Analyte 20                                                               | A               | A20             | Lv. 3   | -0.06368 | -0.05519 | 0.644079 |
| Analyte 21                                                               | A               | A21             | Lv. 3   | -0.01147 | 0.016338 | 0.140487 |
| Analyte 22                                                               | A               | A22             | Lv. 3   | 0.011625 | -0.02658 | 0.1909   |

(Continued next page)

(Table S8, continued)

| Metabolite name | MT <sup>a</sup> | CI <sup>b</sup> | MSI Lv. | OPLS 1   | OPLS 2   | VIP 1    |
|-----------------|-----------------|-----------------|---------|----------|----------|----------|
| Analyte 23      | A               | A23             | Lv. 3   | -0.0078  | -0.05668 | 0.353012 |
| Analyte 24      | A               | A24             | Lv. 3   | -0.0199  | -0.03386 | 0.268799 |
| Analyte 25      | A               | A25             | Lv. 3   | -0.00121 | -0.01555 | 0.095665 |
| Analyte 26      | A               | A26             | Lv. 3   | 0.01756  | -0.00316 | 0.152514 |
| Analyte 27      | A               | A27             | Lv. 3   | 0.002775 | -0.02677 | 0.165412 |
| Analyte 28      | A               | A28             | Lv. 3   | 0.104467 | -0.02121 | 0.909304 |
| Analyte 29      | A               | A29             | Lv. 3   | 0.005616 | -0.00504 | 0.05736  |
| Analyte 30      | A               | A30             | Lv. 3   | -0.06056 | -0.07369 | 0.689399 |
| Analyte 31      | A               | A31             | Lv. 3   | 0.00123  | -0.00909 | 0.056555 |
| Analyte 32      | A               | A32             | Lv. 3   | -0.00818 | -0.01565 | 0.118851 |
| Analyte 33      | A               | A33             | Lv. 3   | -0.04041 | 0.025715 | 0.381996 |
| Analyte 34      | A               | A34             | Lv. 3   | -0.00255 | 0.013494 | 0.085375 |
| Analyte 35      | A               | A35             | Lv. 3   | -0.04127 | 0.029346 | 0.398256 |
| Analyte 36      | A               | A36             | Lv. 3   | -0.0405  | -0.02406 | 0.37866  |
| Analyte 37      | A               | A37             | Lv. 3   | -0.00512 | -0.00957 | 0.073258 |
| Analyte 38      | A               | A38             | Lv. 3   | -0.04844 | -0.01184 | 0.423528 |
| Analyte 39      | A               | A39             | Lv. 3   | -0.07016 | 0.049926 | 0.677149 |
| Analyte 40      | A               | A40             | Lv. 3   | -0.04136 | -0.02417 | 0.385781 |
| Analyte 41      | A               | A41             | Lv. 3   | 0.011704 | 0.007672 | 0.111212 |
| Analyte 42      | A               | A42             | Lv. 3   | 0.041715 | -0.03414 | 0.415621 |
| Analyte 43      | A               | A43             | Lv. 3   | 0.016378 | 0.008864 | 0.151155 |
| Analyte 44      | A               | A44             | Lv. 3   | -0.0187  | -0.01374 | 0.181693 |
| Analyte 45      | A               | A45             | Lv. 3   | -0.0073  | 0.001802 | 0.06381  |
| Analyte 46      | A               | A46             | Lv. 3   | 0.018513 | 0.014666 | 0.182972 |
| Analyte 47      | A               | A47             | Lv. 3   | -0.01307 | -0.02838 | 0.20685  |
| Analyte 48      | A               | A48             | Lv. 3   | -0.03326 | 0.0906   | 0.623695 |
| Analyte 49      | A               | A49             | Lv. 3   | 0.011804 | 0.012121 | 0.125834 |
| Analyte 50      | A               | A50             | Lv. 3   | 0.01118  | -0.01593 | 0.136965 |
| Analyte 51      | A               | A51             | Lv. 3   | -0.00464 | 0.019497 | 0.125746 |
| Analyte 52      | A               | A52             | Lv. 3   | -0.13772 | 0.084567 | 1.29424  |

<sup>a</sup> MT, metabolite profiling type<sup>b</sup> CI, compound index<sup>c</sup> MSI Lv., metabolomics standard initiative level<sup>d</sup> T, identified compounds by targeted metabolite profiling<sup>e</sup> A, automatically identified compounds by non-targeted metabolite profiling



**Table S9.** Relative retention times (RRT) and mass spectral data of hydrophilic compounds as rimethylsilyl derivative.

| Compound          | RT <sup>a</sup> | RRT <sup>b</sup> | Quantification ion <sup>c</sup> | Mass fragment ion <sup>d</sup> |
|-------------------|-----------------|------------------|---------------------------------|--------------------------------|
| Lactic acid       | 04:12.9         | 0.409            | 147                             | 117, 147, 191                  |
| Alanine           | 04:42.9         | 0.458            | 116                             | 116, 147, 190                  |
| Oxalic acid       | 05:08.9         | 0.500            | 147                             | 147                            |
| Glycolic acid     | 05:49.8         | 0.566            | 147                             | 147, 177, 205                  |
| Valine            | 05:56.5         | 0.577            | 144                             | 144, 156, 218                  |
| Urea              | 06:13.7         | 0.605            | 189                             | 147, 171, 189                  |
| Serine (1)        | 06:22.5         | 0.619            | 116                             | 116, 132, 147                  |
| Ethanolamine      | 06:27.8         | 0.628            | 174                             | 100, 147, 174                  |
| Phosphoric acid   | 06:29.4         | 0.630            | 299                             | 299                            |
| Isoleucine        | 06:43.4         | 0.653            | 158                             | 147, 158, 218                  |
| Proline           | 06:47.6         | 0.660            | 142                             | 142, 158, 216                  |
| Glycine           | 06:51.5         | 0.666            | 174                             | 147, 174, 248                  |
| Succinic acid     | 06:56.3         | 0.674            | 147                             | 129, 147, 247                  |
| Glyceric acid     | 07:02.8         | 0.684            | 147                             | 133, 147, 189                  |
| Fumaric acid      | 07:16.9         | 0.707            | 245                             | 143, 147, 245                  |
| Serine (2)        | 07:20.4         | 0.713            | 204                             | 204, 278, 306                  |
| Threonine         | 07:34.2         | 0.735            | 219                             | 117, 218, 291                  |
| β-Alanine         | 07:59.0         | 0.775            | 174                             | 147, 174, 248                  |
| Malic acid        | 08:28.1         | 0.823            | 147                             | 147, 233, 245                  |
| Aspartic acid     | 08:44.7         | 0.849            | 100                             | 100, 147, 232                  |
| Pyroglutamic acid | 08:49.0         | 0.856            | 156                             | 147, 156, 230                  |
| Threonic acid     | 09:01.7         | 0.877            | 147                             | 147, 205, 220                  |
| Glutamic acid     | 09:32.9         | 0.927            | 246                             | 128, 156, 246                  |
| Phenylalanine     | 09:39.4         | 0.938            | 218                             | 100, 192, 218                  |
| Asparagine        | 09:56.6         | 0.966            | 116                             | 116, 132, 231                  |
| Ribitol (IS)      | 10:17.7         | 1.000            | 217                             | 103, 147, 217                  |
| Shikimic acid     | 10:55.2         | 1.061            | 204                             | 147, 204, 255                  |
| Citric acid       | 11:00.1         | 1.069            | 273                             | 147, 273, 347                  |
| Fructose (1)      | 11:19.8         | 1.101            | 103                             | 103, 147, 217                  |
| Fructose (2)      | 11:23.8         | 1.107            | 103                             | 103, 147, 217                  |
| Galactose         | 11:30.1         | 1.117            | 147                             | 147, 205, 319                  |
| Glucose           | 11:30.4         | 1.118            | 147                             | 147, 160, 205                  |
| Mannitol          | 11:42.9         | 1.138            | 319                             | 147, 217, 319                  |
| Lysine            | 11:43.4         | 1.139            | 174                             | 174, 317                       |
| Tyrosine          | 11:51.7         | 1.152            | 218                             | 218, 280                       |
| Inositol          | 12:47.3         | 1.242            | 305                             | 147, 217, 305                  |
| Tryptophan        | 13:37.1         | 1.323            | 202                             | 202, 219, 348                  |
| Sucrose           | 15:44.6         | 1.529            | 217                             | 147, 217, 361                  |
| Raffinose         | 19:10.1         | 1.862            | 217                             | 204, 217, 361                  |

<sup>a</sup> RT, retention time (min:sec)<sup>b</sup> RRT, relative retention time (retention time of the analyte/retention time of the IS)<sup>c</sup> Quantification ion, Specific mass ion for quantification<sup>d</sup> Mass fragment ion, Ions in boldface indicate the specific mass ion used for quantification
